# Supplementary material for: Olfactory Receptor Family 7 Subfamily C Member 1 Is a Novel Marker of Colon Cancer–Initiating Cells and Is a Potent Target of Immunotherapy
Source: Oxford University Press journal article supplement (doi:10.1158/1078-0432.ccr-15-1709), 2016-02-09
Supplement: 10780432ccr151709-sup-152880_2_supp_data_3289360_m06hmm.xls [file 10780432ccr151709-sup-152880_2_supp_data_3289360_m06hmm.xls]

## Sheet: Sheet1
Table S1 . Summary of genes overexpressed in SP cells
GenBank_accession	Description	Gene ontology	treat/cont(635/532)	treat/cont(532/635)
NM_002083	Homo sapiens glutathione peroxidase 2 (gastrointestinal) (GPX2), transcript variant 1, mRNA	peroxidase reaction	59.4157	78.8425
NM_014420	Homo sapiens dickkopf WNT signaling pathway inhibitor 4 (DKK4), mRNA	development	41.9756	88.5623
NM_005025	Homo sapiens serpin peptidase inhibitor, clade I (neuroserpin), member 1 (SERPINI1), transcript variant 1, mRNA	peripheral nervous system development	40.6433	84.082
NM_080759	Homo sapiens dachshund homolog 1 (Drosophila) (DACH1), transcript variant 1, mRNA	cell growth and/or maintenance	34.8116	74.0075
NM_152792	Homo sapiens aspartic peptidase, retroviral-like 1 (ASPRV1), mRNA	proteolysis and peptidolysis	33.9524	63.3161
NM_007127	Homo sapiens villin 1 (VIL1), mRNA	cytoskeleton organization and biogenesis	31.3884	12.5082
NM_058173	Homo sapiens mucin-like 1 (MUCL1), mRNA	cell growth and/or maintenance	26.671	53.9453
NM_003739	Homo sapiens aldo-keto reductase family 1, member C3 (AKR1C3), transcript variant 1, mRNA	prostaglandin metabolism	20.6104	24.8659
AA075521	zm87h10.s1 Stratagene ovarian cancer (#937219) Homo sapiens cDNA clone IMAGE:544963 3- similar to gb:X58295_rna1 PLASMA GLUTATHIONE PEROXIDASE PRECURSOR (HUMAN);, mRNA sequence	peroxidase reaction	19.1046	23.994
NM_012242	Homo sapiens dickkopf WNT signaling pathway inhibitor 1 (DKK1), mRNA	development	18.1943	46.5885
NM_021010	Homo sapiens defensin, alpha 5, Paneth cell-specific (DEFA5), mRNA	physiological processes	17.5418	41.7242
NM_006080	Homo sapiens sema domain, immunoglobulin domain (Ig), short basic domain, secreted, (semaphorin) 3A (SEMA3A), mRNA	neurogenesis	14.5017	14.5331
NM_080672	Homo sapiens phosphatase and actin regulator 3 (PHACTR3), transcript variant 1, mRNA	enzyme associated with the nuclear scaffold	12.8252	19.7165
NM_004387	Homo sapiens NK2 homeobox 5 (NKX2-5), transcript variant 1, mRNA	regulation of transcription, DNA-dependent	12.6461	14.9382
NM_000787	Homo sapiens dopamine beta-hydroxylase (dopamine beta-monooxygenase) (DBH), mRNA	catecholamine metabolism	11.974	23.3746
NM_052863	Homo sapiens secretoglobin, family 3A, member 1 (SCGB3A1), mRNA	Potential growth inhibitory cytokine	11.2426	4.69615
NM_152311	Homo sapiens clarin 3 (CLRN3), mRNA	unknown	11.2113	31.8972
NM_000927	Homo sapiens ATP-binding cassette, sub-family B (MDR/TAP), member 1 (ABCB1), mRNA	transport	10.9763	15.7401
AK001085	Homo sapiens cDNA FLJ10223 fis, clone HEMBB1000024	unknown	10.9319	5.39569
NM_001730	Homo sapiens Kruppel-like factor 5 (intestinal) (KLF5), mRNA	regulation of transcription, DNA-dependent	10.2782	20.3367
BC040970	Homo sapiens GRAM domain containing 1B, mRNA (cDNA clone IMAGE:3854666)	unknown	10.2529	5.60329
BC017980	Homo sapiens cDNA clone IMAGE:4245141, partial cds	unknown	10.0382	25.0789
NM_004811	Homo sapiens leupaxin (LPXN), transcript variant 2, mRNA	protein complex assembly	9.96434	6.14266
AK097318	Homo sapiens cDNA FLJ39999 fis, clone STOMA2002828	unknown	9.86154	7.52074
NM_001387	Homo sapiens dihydropyrimidinase-like 3 (DPYSL3), transcript variant 2, mRNA	nitrogen metabolism	9.08274	17.9267
NM_138969	Homo sapiens short chain dehydrogenase/reductase family 16C, member 5 (SDR16C5), mRNA	metabolism	9.04711	18.9894
NM_003542	Homo sapiens histone cluster 1, H4c (HIST1H4C), mRNA	nucleosome assembly	9.03952	16.5467
NM_001089	Homo sapiens ATP-binding cassette, sub-family A (ABC1), member 3 (ABCA3), mRNA	transport	9.01433	14.7854
NM_004861	Homo sapiens galactose-3-O-sulfotransferase 1 (GAL3ST1), mRNA	metabolism	8.83974	8.94204
AB067471	Homo sapiens mRNA for KIAA1884 protein, partial cds	unknown	8.77888	12.97
X89676	H.sapiens mRNA for TPCR86 protein	G-protein coupled receptor protein signaling pathway	8.7757	17.813
NM_002193	Homo sapiens inhibin, beta B (INHBB), mRNA	cell-cell signaling	8.61373	18.7124
NM_022840	Homo sapiens methyltransferase like 4 (METTL4), mRNA	DNA methylation	8.44791	10.5276
NM_000351	Homo sapiens steroid sulfatase (microsomal), isozyme S (STS), mRNA	steroid catabolism	8.17702	7.59344
BC038512	Homo sapiens cDNA clone IMAGE:5262734	unknown	8.07781	14.6697
BI759100	603042504F1 NIH_MGC_116 Homo sapiens cDNA clone IMAGE:5182897 5-, mRNA sequence	unknown	7.66935	10.2608
AB037734	Homo sapiens mRNA for KIAA1313 protein, partial cds	homophilic cell adhesion	7.62907	14.4641
NM_000954	Homo sapiens prostaglandin D2 synthase 21kDa (brain) (PTGDS), mRNA	transport	7.53742	9.84035
NM_005621	Homo sapiens S100 calcium binding protein A12 (S100A12), mRNA	inflammatory response	7.4494	14.8836
NM_000545	Homo sapiens HNF1 homeobox A (HNF1A), mRNA	regulation of transcription, DNA-dependent	7.18028	7.52983
U58662	Human mRNA upregulated during camptothecin-induced apoptosis of U937 cells	unknown	7.09621	13.1456
AK055418	Homo sapiens cDNA FLJ30856 fis, clone FEBRA2003258	unknown	6.95643	4.86047
NM_002686	Homo sapiens phenylethanolamine N-methyltransferase (PNMT), transcript variant 1, mRNA	catecholamine metabolism	6.79199	8.8425
NM_018645	Homo sapiens hairy and enhancer of split 6 (Drosophila) (HES6), transcript variant 1, mRNA	development	6.21538	12.9998
NM_024717	Homo sapiens multiple C2 domains, transmembrane 1 (MCTP1), transcript variant L, mRNA	tryptophan biosynthesis	6.02613	12.1361
NM_005709	Homo sapiens Usher syndrome 1C (autosomal recessive, severe) (USH1C), transcript variant 1, mRNA	intracellular signaling cascade	5.96085	13.2365
NM_002607	Homo sapiens platelet-derived growth factor alpha polypeptide (PDGFA), transcript variant 1, mRNA	cell-cell signaling	5.92195	10.7857
NM_018355	Homo sapiens zinc finger protein 415 (ZNF415), transcript variant 2, mRNA	regulation of transcription, DNA-dependent	5.92042	3.10832
NM_138933	Homo sapiens APOBEC1 complementation factor (A1CF), transcript variant 3, mRNA	mRNA editing	5.67489	6.35208
NM_005447	Homo sapiens Ras association (RalGDS/AF-6) domain family (N-terminal) member 9 (RASSF9), mRNA	peptidylglycine alpha-amidating monooxygenase	5.58959	4.83685
AF129263	Homo sapiens clone BPR-4 mRNA sequence	unknown	5.53225	8.37356
BC037919	Homo sapiens cDNA clone IMAGE:5278089	unknown	5.4924	5.5172
NM_144686	Homo sapiens transmembrane channel-like 4 (TMC4), transcript variant 2, mRNA	unknown	5.48017	11.0766
NM_018976	Homo sapiens solute carrier family 38, member 2 (SLC38A2), mRNA	amino acid transport	5.44854	6.83967
NM_021073	Homo sapiens bone morphogenetic protein 5 (BMP5), mRNA	ossification	5.44466	3.00754
NM_005056	Homo sapiens lysine (K)-specific demethylase 5A (KDM5A), transcript variant 2, mRNA	gene regulation	5.43534	8.9855
NM_133631	Homo sapiens roundabout, axon guidance receptor, homolog 1 (Drosophila) (ROBO1), transcript variant 2, mRNA	cell adhesion	5.43236	7.86687
BC005348	Homo sapiens apolipoprotein C-II, mRNA (cDNA clone MGC:12445 IMAGE:3935036), complete cds	lipid catabolism	5.40957	9.95992
NM_001453	Homo sapiens forkhead box C1 (FOXC1), mRNA	regulation of transcription, DNA-dependent	5.34333	13.5523
NM_002758	Homo sapiens mitogen-activated protein kinase kinase 6 (MAP2K6), mRNA	protein amino acid phosphorylation	5.33534	8.94486
NM_023940	Homo sapiens RAS-like, family 11, member B (RASL11B), mRNA	small GTPase mediated signal transduction	5.32774	8.58625
NM_006094	Homo sapiens deleted in liver cancer 1 (DLC1), transcript variant 2, mRNA	regulation of small GTP-binding proteins	5.31831	7.42335
AK054953	Homo sapiens cDNA FLJ30391 fis, clone BRACE2008336	unknown	5.30462	4.31215
NM_018272	Homo sapiens cancer susceptibility candidate 1 (CASC1), transcript variant 1, mRNA	cytoskeleton organization and biogenesis	5.28877	5.0444
NM_025189	Homo sapiens zinc finger protein 430 (ZNF430), transcript variant 1, mRNA	regulation of transcription, DNA-dependent	5.26768	5.12253
NM_003495	Homo sapiens histone cluster 1, H4i (HIST1H4I), mRNA	nucleosome assembly	5.26342	3.55956
AI762077	wi53d02.x1 NCI_CGAP_Co16 Homo sapiens cDNA clone IMAGE:2393955 3-, mRNA sequence	unknown	5.25136	8.3691
NM_001759	Homo sapiens cyclin D2 (CCND2), mRNA	regulation of cell cycle	5.22957	12.9253
NM_024546	Homo sapiens ring finger protein 219 (RNF219), mRNA	unknown	5.1936	7.06759
NM_031200	Homo sapiens chemokine (C-C motif) receptor 9 (CCR9), transcript variant A, mRNA	cytosolic calcium ion concentration elevation	5.18857	11.5153
NM_017610	Homo sapiens ring finger protein 111 (RNF111), transcript variant 2, mRNA	unknown	5.17905	10.0408
BC040919	Homo sapiens, clone IMAGE:5750475, mRNA	unknown	5.14724	9.21836
AK096661	Homo sapiens cDNA FLJ39342 fis, clone OCBBF2018873	unknown	5.13117	5.75074
AL832643	Homo sapiens mRNA; cDNA DKFZp451K2118 (from clone DKFZp451K2118)	lipid catabolism	5.08023	7.41748
NM_005639	Homo sapiens synaptotagmin I (SYT1), transcript variant 1, mRNA	transport	5.06674	8.45891
NM_003405	Homo sapiens tyrosine 3-monooxygenase/tryptophan 5-monooxygenase activation protein, eta polypeptide (YWHAH), mRNA	protein kinase C activation	4.98959	6.65285
NM_001731	Homo sapiens B-cell translocation gene 1, anti-proliferative (BTG1), mRNA	negative regulation of cell proliferation	4.98723	11.0066
AK021764	Homo sapiens cDNA FLJ11702 fis, clone HEMBA1005066	unknown	4.94554	5.31983
NM_021101	Homo sapiens claudin 1 (CLDN1), mRNA	cell adhesion	4.92019	13.4514
NM_020651	Homo sapiens pellino E3 ubiquitin protein ligase 1 (PELI1), mRNA	signal transduction	4.88179	5.48775
NM_004413	Homo sapiens dipeptidase 1 (renal) (DPEP1), transcript variant 1, mRNA	proteolysis and peptidolysis	4.85282	3.90941
NM_003211	Homo sapiens thymine-DNA glycosylase (TDG), mRNA	metabolism	4.74458	5.8369
NM_058186	Homo sapiens family with sequence similarity 3, member B (FAM3B), transcript variant 1, mRNA	unknown	4.66528	6.46638
AB051436	Homo sapiens mRNA for KIAA1133 protein, partial cds	proteolysis and peptidolysis	4.66347	6.9943
AW967587	EST379662 MAGE resequences, MAGJ Homo sapiens cDNA, mRNA sequence	unknown	4.65599	10.6206
NM_005034	Homo sapiens polymerase (RNA) II (DNA directed) polypeptide K, 7.0kDa (POLR2K), mRNA	physiological processes	4.65464	10.2358
NM_172211	Homo sapiens colony stimulating factor 1 (macrophage) (CSF1), transcript variant 3, mRNA	positive regulation of cell proliferation	4.65454	4.38684
NM_021190	Homo sapiens polypyrimidine tract binding protein 2 (PTBP2), mRNA	mRNA splice site selection	4.54295	6.60607
BG779035	602667016F1 NIH_MGC_60 Homo sapiens cDNA clone IMAGE:4807130 5-, mRNA sequence	unknown	4.53918	3.76068
AB058720	Homo sapiens mRNA for KIAA1817 protein, partial cds	intracellular signaling cascade	4.53246	4.60178
NM_006549	Homo sapiens calcium/calmodulin-dependent protein kinase kinase 2, beta (CAMKK2), transcript variant 1, mRNA	protein amino acid phosphorylation	4.50277	3.17529
NM_014505	Homo sapiens potassium large conductance calcium-activated channel, subfamily M, beta member 4 (KCNMB4), mRNA	potassium ion transport	4.47176	8.16673
NM_013346	Homo sapiens sorting nexin 12 (SNX12), transcript variant 2, mRNA	intracellular signaling cascade	4.46556	4.73281
NM_002260	Homo sapiens killer cell lectin-like receptor subfamily C, member 2 (KLRC2), mRNA	cellular defense response	4.41458	10.1767
NM_002595	Homo sapiens cyclin-dependent kinase 17 (CDK17), transcript variant 1, mRNA	protein kinases	4.39456	2.30605
AL713660	Homo sapiens mRNA; cDNA DKFZp667E0512 (from clone DKFZp667E0512)	unknown	4.36978	6.07412
AF147380	mo sapiens full length insert cDNA clone YB67A06	unknown	4.36102	11.4301
NM_001031	Homo sapiens ribosomal protein S28 (RPS28), mRNA	protein biosynthesis	4.34615	14.1383
NM_002015	Homo sapiens forkhead box O1 (FOXO1), mRNA	regulation of transcription, DNA-dependent	4.3301	3.62264
NM_031866	Homo sapiens frizzled family receptor 8 (FZD8), mRNA	G-protein coupled receptor protein signaling pathway	4.32229	7.31972
AK026883	Homo sapiens cDNA: FLJ23230 fis, clone CAE07143	unknown	4.30012	4.99205
BM811537	AGENCOURT_6594521 NIH_MGC_98 Homo sapiens cDNA clone IMAGE:5478062 5-, mRNA sequence	unknown	4.28658	2.6895
BC040295	Homo sapiens ring finger protein 138 pseudogene 1, mRNA	pseudo gene	4.27757	3.92918
NM_000159	Homo sapiens glutaryl-CoA dehydrogenase (GCDH), transcript variant 1, mRNA	electron transport	4.25492	6.50441
AK094088	Homo sapiens cDNA FLJ36769 fis, clone ADIPS2000245	unknown	4.22818	4.13877
NM_005168	Homo sapiens Rho family GTPase 3 (RND3), transcript variant 2, mRNA	small GTPase mediated signal transduction	4.22524	7.02889
AA070417	zm68d09.r1 Stratagene neuroepithelium (#937231) Homo sapiens cDNA clone IMAGE:530801 5- similar to gb:X02747 FRUCTOSE-BISPHOSPHATE ALDOLASE B (HUMAN);, mRNA sequence	unknown	4.19503	6.82108
BC010544	Homo sapiens cDNA clone IMAGE:3462401, partial cds	unknown	4.15319	4.90994
NM_000392	Homo sapiens ATP-binding cassette, sub-family C (CFTR/MRP), member 2 (ABCC2), mRNA	transport	4.14302	5.63725
NM_004360	Homo sapiens cadherin 1, type 1, E-cadherin (epithelial) (CDH1), mRNA	homophilic cell adhesion	4.09025	10.7461
NM_001546	Homo sapiens inhibitor of DNA binding 4, dominant negative helix-loop-helix protein (ID4), mRNA	regulation of transcription from Pol II promoter	4.0626	9.69442
NM_053000	Homo sapiens chromosome 5 open reading frame 26 (C5orf26), mRNA	unknown	4.04951	9.04789
NM_006482	Homo sapiens dual-specificity tyrosine-(Y)-phosphorylation regulated kinase 2 (DYRK2), transcript variant 2, mRNA	protein amino acid phosphorylation	4.04927	6.53733
NM_021923	Homo sapiens fibroblast growth factor receptor-like 1 (FGFRL1), transcript variant 3, mRNA	regulation of cell growth	4.04622	4.64179
AK023424	Homo sapiens cDNA FLJ13362 fis, clone PLACE1000236	unknown	4.0368	7.51533
NM_080824	Homo sapiens family with sequence similarity 209, member B (FAM209B), mRNA	unknown	4.0247	3.07305
AK026400	Homo sapiens cDNA: FLJ22747 fis, clone KAIA0120	unknown	3.99951	4.18921
NM_015236	Homo sapiens latrophilin 3 (LPHN3), mRNA	neuropeptide signaling pathway	3.9975	5.76741
AB051505	Homo sapiens mRNA for KIAA1718 protein, partial cds	regulation of transcription, DNA-dependent	3.99513	5.63901
NM_006991	Homo sapiens zinc finger protein 197 (ZNF197), transcript variant 1, mRNA	regulation of transcription, DNA-dependent	3.97901	3.11356
NM_019000	Homo sapiens family with sequence similarity 134, member B (FAM134B), transcript variant 2, mRNA	transport	3.96364	12.6825
NM_014246	Homo sapiens cadherin, EGF LAG seven-pass G-type receptor 1 (CELSR1), mRNA	homophilic cell adhesion	3.93453	5.83039
NM_033185	Homo sapiens keratin associated protein 3-3 (KRTAP3-3), mRNA	defense response	3.929	2.91989
AK055007	Homo sapiens cDNA FLJ30445 fis, clone BRACE2009238	unknown	3.91213	5.05975
AK054971	Homo sapiens cDNA FLJ30409 fis, clone BRACE2008615	unknown	3.90168	3.07751
NM_000526	Homo sapiens keratin 14 (KRT14), mRNA	cell organization and biogenesis	3.88053	5.09735
NM_033201	Homo sapiens chromosome 16 open reading frame 45 (C16orf45), transcript variant 1, mRNA	unknown	3.86147	2.24156
NM_133638	Homo sapiens ADAM metallopeptidase with thrombospondin type 1 motif, 19 (ADAMTS19), mRNA	proteolysis and peptidolysis	3.85271	5.67417
AL832977	Homo sapiens mRNA; cDNA DKFZp666M032 (from clone DKFZp666M032)	unknown	3.83343	8.27356
NM_017635	Homo sapiens suppressor of variegation 4-20 homolog 1 (Drosophila) (SUV420H1), transcript variant 1, mRNA	regulation of transcription, DNA-dependent	3.80556	5.46581
NM_032021	Homo sapiens transmembrane protein 133 (TMEM133), mRNA	unknown	3.76659	2.3499
AL833872	Homo sapiens mRNA; cDNA DKFZp761P0423 (from clone DKFZp761P0423)	unknown	3.76459	7.69931
AL133561	Homo sapiens mRNA; cDNA DKFZp434C196 (from clone DKFZp434C196); partial cds	unknown	3.76352	5.94691
AB040945	Homo sapiens mRNA for KIAA1512 protein, partial cds	proteolysis and peptidolysis	3.75085	8.03057
AK022250	Homo sapiens cDNA FLJ12188 fis, clone MAMMA1000839	unknown	3.73708	2.70417
NM_001964	Homo sapiens early growth response 1 (EGR1), mRNA	regulation of transcription, DNA-dependent	3.70228	2.90274
NM_000399	Homo sapiens early growth response 2 (EGR2), transcript variant 1, mRNA	peripheral nervous system development	3.68721	4.85901
AK074285	Homo sapiens cDNA FLJ23705 fis, clone HEP11066	negative regulation of cell proliferation	3.68357	8.62836
NM_025190	Homo sapiens ankyrin repeat domain 36B (ANKRD36B), mRNA	di-, tri-valent inorganic anion homeostasis	3.67086	5.59569
NM_004524	Homo sapiens lethal giant larvae homolog 2 (Drosophila) (LLGL2), transcript variant 1, mRNA	unknown	3.66878	5.84925
NM_003573	Homo sapiens latent transforming growth factor beta binding protein 4 (LTBP4), transcript variant 2, mRNA	cell growth and/or maintenance	3.63222	4.99628
NM_001202	Homo sapiens bone morphogenetic protein 4 (BMP4), transcript variant 1, mRNA	ossification	3.63168	3.99791
AB033025	Homo sapiens mRNA for KIAA1199 protein, partial cds	N-linked glycosylation	3.62394	5.50724
NM_153023	Homo sapiens spermatogenesis associated 13 (SPATA13), transcript variant 2, mRNA	spermatogenesis	3.62322	4.52719
AK024475	Homo sapiens mRNA for FLJ00068 protein, partial cds	protein amino acid phosphorylation	3.5936	8.79078
NM_032401	Homo sapiens transmembrane protease, serine 3 (TMPRSS3), transcript variant B, mRNA	proteolysis and peptidolysis	3.58482	6.22492
AB028984	Homo sapiens mRNA for KIAA1061 protein, partial cds	transport	3.58414	4.70509
NM_002073	Homo sapiens guanine nucleotide binding protein (G protein), alpha z polypeptide (GNAZ), mRNA	G-protein coupled receptor protein signaling pathway	3.56802	4.46596
NM_001450	Homo sapiens four and a half LIM domains 2 (FHL2), transcript variant 1, mRNA	positive regulation of cell proliferation	3.56321	6.53016
BC027875	Homo sapiens myosin XVB pseudogene, mRNA (cDNA clone IMAGE:5205535)	pseudo gene	3.56152	6.34811
AL137725	Homo sapiens mRNA; cDNA DKFZp434G0719 (from clone DKFZp434G0719); partial cds	unknown	3.55783	5.18323
NM_002165	Homo sapiens inhibitor of DNA binding 1, dominant negative helix-loop-helix protein (ID1), transcript variant 1, mRNA	development	3.52685	5.94384
NM_002286	Homo sapiens lymphocyte-activation gene 3 (LAG3), mRNA	defense response	3.51468	2.71942
AB033053	Homo sapiens mRNA for KIAA1227 protein, partial cds	regulation of transcription, DNA-dependent	3.50952	7.24697
AI085338	qf22f12.x1 NCI_CGAP_Brn25 Homo sapiens cDNA clone IMAGE:1750799 3-, mRNA sequence	unknown	3.49579	4.20021
BC015433	Homo sapiens, clone IMAGE:4413555, mRNA	unknown	3.47084	4.4146
NM_001185	Homo sapiens alpha-2-glycoprotein 1, zinc-binding (AZGP1), mRNA	immune response	3.46408	2.8023
NM_005935	Homo sapiens AF4/FMR2 family, member 1 (AFF1), transcript variant 2, mRNA	cell growth and/or maintenance	3.46316	5.89409
NM_002460	Homo sapiens interferon regulatory factor 4 (IRF4), transcript variant 1, mRNA	regulation of transcription, DNA-dependent	3.45965	4.35151
NM_016374	Homo sapiens AT rich interactive domain 4B (RBP1-like) (ARID4B), transcript variant 1, mRNA	diverse cellular processes	3.45843	2.81988
AK074994	Homo sapiens cDNA FLJ90513 fis, clone NT2RP3004355	unknown	3.45749	4.15729
AK055362	Homo sapiens cDNA FLJ30800 fis, clone FEBRA2001197	unknown	3.45592	5.23525
AK021714	Homo sapiens cDNA FLJ11652 fis, clone HEMBA1004461	unknown	3.43975	4.9124
NM_003865	Homo sapiens HESX homeobox 1 (HESX1), mRNA	regulation of transcription, DNA-dependent	3.43725	5.50234
AL833051	Homo sapiens mRNA; cDNA DKFZp666H219 (from clone DKFZp666H219)	unknown	3.41659	4.01137
AB082530	Homo sapiens mRNA for KIAA1999 protein	unknown	3.39223	2.75343
AK097327	Homo sapiens cDNA FLJ40008 fis, clone STOMA2005120	unknown	3.3691	4.69119
NM_130436	Homo sapiens dual-specificity tyrosine-(Y)-phosphorylation regulated kinase 1A (DYRK1A), transcript variant 2, mRNA	peptidyl-tyrosine phosphorylation	3.36364	4.44057
NM_002557	Homo sapiens oviductal glycoprotein 1, 120kDa (OVGP1), mRNA	metabolism	3.36358	3.59873
NM_012259	Homo sapiens hairy/enhancer-of-split related with YRPW motif 2 (HEY2), mRNA	regulation of transcription, DNA-dependent	3.36209	5.74438
NM_000845	Homo sapiens glutamate receptor, metabotropic 8 (GRM8), transcript variant 1, mRNA	G-protein coupled receptor protein signaling pathway	3.3604	5.89334
AK000618	Homo sapiens cDNA FLJ20611 fis, clone KAT05735	Unknown	3.35874	2.82548
NM_000238	Homo sapiens potassium voltage-gated channel, subfamily H (eag-related), member 2 (KCNH2), transcript variant 1, mRNA	potassium ion transport	3.355	5.8721
AK074366	Homo sapiens cDNA FLJ23786 fis, clone HEP21350	regulation of transcription, DNA-dependent	3.35155	2.28355
AK027033	Homo sapiens cDNA: FLJ23380 fis, clone HEP16267, highly similar to HUMIREBPA Human iron-responsive element-binding protein/iron regulatory protein 2 (IRE-BP2/IRP2) mRNA	metabolism	3.35138	3.99214
NM_012396	Homo sapiens pleckstrin homology-like domain, family A, member 3 (PHLDA3), transcript variant 1, mRNA	physiological processes	3.34771	6.26046
BU619315	UI-H-FH1-bfr-p-10-0-UI.s1 NCI_CGAP_FH1 Homo sapiens cDNA clone UI-H-FH1-bfr-p-10-0-UI 3-, mRNA sequence	unknown	3.34666	5.05957
NM_000980	Homo sapiens ribosomal protein L18a (RPL18A), mRNA	protein biosynthesis	3.34653	6.80536
AK023328	Homo sapiens cDNA FLJ13266 fis, clone OVARC1000960	unknown	3.33841	4.20153
AK054626	Homo sapiens cDNA FLJ30064 fis, clone ADRGL2000323	Unknown	3.33085	2.54948
AK095226	Homo sapiens cDNA FLJ37907 fis, clone COLON2009337	Unknown	3.33031	4.24159
AK093413	Homo sapiens cDNA FLJ36094 fis, clone TESTI2020717, highly similar to Human testis-specific protein (TSPY) mRNA	nucleosome assembly	3.32752	6.11637
BC036194	Homo sapiens chromosome 3 open reading frame 59, mRNA (cDNA clone MGC:39517 IMAGE:5267040), complete cds	Unknown	3.3243	2.45325
AK091831	Homo sapiens cDNA FLJ34512 fis, clone HLUNG2006570	Unknown	3.29912	3.10935
NM_015993	Homo sapiens plasmolipin (PLLP), mRNA	ion transport	3.29208	2.75306
NM_012342	Homo sapiens BMP and activin membrane-bound inhibitor (BAMBI), mRNA	TGFbeta receptor signaling pathway	3.28995	6.10614
BC026277	Homo sapiens, clone IMAGE:4701563, mRNA	Unknown	3.28963	6.12547
NM_030925	Homo sapiens calcium binding protein 39-like (CAB39L), transcript variant 1, mRNA	Unknown	3.26939	3.85748
NM_004828	Homo sapiens natural cytotoxicity triggering receptor 2 (NCR2), transcript variant 1, mRNA	cellular defense response	3.26484	5.72656
BC034779	Homo sapiens chromosome 19 open reading frame 45, mRNA (cDNA clone MGC:35139 IMAGE:5168945), complete cds	regulation of transcription, DNA-dependent	3.25555	3.23148
BC009415	Homo sapiens kinesin family member 26A, mRNA (cDNA clone IMAGE:3502885), complete cds	microtubule-based process	3.25333	5.50208
NM_006343	Homo sapiens c-mer proto-oncogene tyrosine kinase (MERTK), mRNA	protein amino acid phosphorylation	3.24209	2.72479
NM_015909	Homo sapiens neuroblastoma amplified sequence (NBAS), transcript variant 1, mRNA	protein biosynthesis	3.23744	5.79925
AK023967	Homo sapiens cDNA FLJ13905 fis, clone THYRO1001907	Unknown	3.23618	2.08131
AA025796	ze81g09.s1 Soares_fetal_heart_NbHH19W Homo sapiens cDNA clone IMAGE:365440 3-, mRNA sequence	Unknown	3.23539	6.55313
BC035326	Homo sapiens cDNA clone IMAGE:5186324, partial cds	unknown	3.22122	2.9908
NM_002517	Homo sapiens neuronal PAS domain protein 1 (NPAS1), mRNA	signal transduction	3.21806	4.15589
NM_002630	Homo sapiens progastricsin (pepsinogen C) (PGC), transcript variant 1, mRNA	proteolysis and peptidolysis	3.20767	2.52532
NM_033103	Homo sapiens rhophilin, Rho GTPase binding protein 2 (RHPN2), mRNA	intracellular signaling cascade	3.20478	5.66271
NM_005738	Homo sapiens ADP-ribosylation factor-like 4A (ARL4A), transcript variant 1, mRNA	small GTPase mediated signal transduction	3.1981	8.30051
NM_018212	Homo sapiens enabled homolog (Drosophila) (ENAH), transcript variant 2, mRNA	development	3.19336	6.47185
NM_053275	Homo sapiens ribosomal protein, large, P0 (RPLP0), transcript variant 2, mRNA	protein biosynthesis	3.19066	7.7896
NM_001022	Homo sapiens ribosomal protein S19 (RPS19), mRNA	protein biosynthesis	3.18777	5.33777
NM_005375	Homo sapiens v-myb avian myeloblastosis viral oncogene homolog (MYB), transcript variant 2, mRNA	regulation of transcription, DNA-dependent	3.17225	3.86969
BC035087	Homo sapiens ankyrin repeat domain 46, mRNA (cDNA clone IMAGE:5261039), with apparent retained intron	protein-protein interactions in a variety of cellular processes	3.15939	2.99976
NM_133370	Homo sapiens YTH domain containing 1 (YTHDC1), transcript variant 2, mRNA	signal transduction	3.13686	4.06285
NM_000196	Homo sapiens hydroxysteroid (11-beta) dehydrogenase 2 (HSD11B2), mRNA	metabolism	3.12471	3.7339
NM_000673	Homo sapiens alcohol dehydrogenase 7 (class IV), mu or sigma polypeptide (ADH7), transcript variant 2, mRNA	ethanol oxidation	3.11036	4.23273
NM_145245	Homo sapiens ecotropic viral integration site 5-like (EVI5L), transcript variant 2, mRNA	transport	3.09359	2.64324
AL832889	Homo sapiens genomic DNA; cDNA DKFZp667P163 (from clone DKFZp667P163)	Unknown	3.08518	3.9766
AF238318	Homo sapiens clone HZFc1, partial sequence	Unknown	3.07353	4.77998
AL831866	Homo sapiens genomic DNA; cDNA DKFZp761O0117 (from clone DKFZp761O0117)	Unknown	3.06443	2.27823
AL442085	Homo sapiens genomic DNA; cDNA DKFZp547I084 (from clone DKFZp547I084)	Unknown	3.0477	2.40977
NM_148968	Homo sapiens tumor necrosis factor receptor superfamily, member 25 (TNFRSF25), transcript variant 5, mRNA	signal transduction	3.02699	2.8311
BC024661	Homo sapiens TAF3 RNA polymerase II, TATA box binding protein (TBP)-associated factor, 140kDa, mRNA (cDNA clone IMAGE:4480702), **** WARNING: chimeric clone ****	regulation of transcription, DNA-dependent	3.02587	2.54251
AK096759	Homo sapiens cDNA FLJ39440 fis, clone PROST2005788	Unknown	2.99478	3.15222
AB033091	Homo sapiens mRNA for KIAA1265 protein, partial cds	Unknown	2.9939	4.53042
NM_018364	Homo sapiens round spermatid basic protein 1 (RSBN1), mRNA	signal transduction	2.99309	2.35317
NM_006965	Homo sapiens zinc finger protein 24 (ZNF24), mRNA	regulation of transcription, DNA-dependent	2.98886	3.76392
NM_006618	Homo sapiens lysine (K)-specific demethylase 5B (KDM5B), mRNA	regulation of transcription, DNA-dependent	2.98475	3.5135
BE542563	601063949F1 NIH_MGC_10 Homo sapiens cDNA clone IMAGE:3450157 5-, mRNA sequence	unknown	2.98334	2.07507
D86985	Homo sapiens mRNA for KIAA0232 protein, partial cds	Unknown	2.97398	4.54073
NM_018187	Homo sapiens hypothetical protein FLJ10707 (FLJ10707), mRNA	regulation of transcription, DNA-dependent	2.97196	6.44156
AL834122	Homo sapiens mRNA; cDNA DKFZp761F1821 (from clone DKFZp761F1821)	Unknown	2.9632	3.22999
NM_080752	Homo sapiens zinc finger, SWIM-type containing 3 (ZSWIM3), transcript variant 1, mRNA	Unknown	2.96221	3.99899
AJ133439	Homo sapiens mRNA for GRIP1 protein	intracellular signaling cascade	2.96021	3.90229
NM_020632	Homo sapiens ATPase, H+ transporting, lysosomal V0 subunit a4 (ATP6V0A4), transcript variant 1, mRNA	hydrogen transport	2.95391	4.12217
NM_022121	Homo sapiens PERP, TP53 apoptosis effector (PERP), mRNA	induction of apoptosis	2.95283	4.75218
NM_139202	Homo sapiens megalencephalic leukoencephalopathy with subcortical cysts 1 (MLC1), transcript variant 2, mRNA	transport	2.95081	8.13667
AV753204	AV753204 NPD Homo sapiens cDNA clone NPDBDB08 5-, mRNA sequence	unknown	2.94841	4.30201
NM_001432	Homo sapiens epiregulin (EREG), mRNA	cellular process	2.94606	4.66878
NM_015000	Homo sapiens serine/threonine kinase 38 like (STK38L), mRNA	protein amino acid phosphorylation	2.94233	5.88667
NM_021910	Homo sapiens FXYD domain containing ion transport regulator 3 (FXYD3), transcript variant 2, mRNA	ion transport	2.93835	3.39951
BU743191	UI-E-EJ1-ajj-a-07-0-UI.s1 UI-E-EJ1 Homo sapiens cDNA clone UI-E-EJ1-ajj-a-07-0-UI 3-, mRNA sequence	unknown	2.93136	4.02642
AK024304	Homo sapiens cDNA FLJ14242 fis, clone OVARC1000678	unknown	2.92899	5.16229
NM_025245	Homo sapiens pre-B-cell leukemia homeobox 4 (PBX4), transcript variant 1, mRNA	regulation of transcription, DNA-dependent	2.91645	4.05192
NM_021960	Homo sapiens myeloid cell leukemia sequence 1 (BCL2-related) (MCL1), transcript variant 1, mRNA	apoptosis	2.89611	6.43999
AB037742	Homo sapiens mRNA for KIAA1321 protein, partial cds	unknown	2.89289	3.09736
BQ955249	AGENCOURT_8876646 Lupski_sciatic_nerve Homo sapiens cDNA clone IMAGE:6203942 5-, mRNA sequence	unknown	2.8836	2.6026
NM_003428	Homo sapiens zinc finger protein 84 (ZNF84), transcript variant 1, mRNA	regulation of transcription, DNA-dependent	2.88326	5.39686
NM_144704	Homo sapiens apoptosis-inducing factor, mitochondrion-associated, 3 (AIFM3), transcript variant 1, mRNA	apoptosis	2.87703	6.74729
BC019354	Homo sapiens hypothetical LOC729614, mRNA (cDNA clone IMAGE:3946181), with apparent retained intron	unknown	2.87637	3.59773
BQ771746	UI-H-EZ1-bbj-l-08-0-UI.s1 NCI_CGAP_Ch2 Homo sapiens cDNA clone UI-H-EZ1-bbj-l-08-0-UI 3-, mRNA sequence	unknown	2.87617	3.39007
AL833749	Homo sapiens mRNA; cDNA DKFZp666L166 (from clone DKFZp666L166)	unknown	2.86119	2.97454
NM_031475	Homo sapiens espin (ESPN), mRNA	cell growth and/or maintenance	2.84045	4.37055
BC029126	Homo sapiens lysozyme G-like 1, mRNA (cDNA clone MGC:35380 IMAGE:5184582), complete cds	peptidoglycan catabolism	2.8378	2.03776
NM_006577	Homo sapiens UDP-GlcNAc:betaGal beta-1,3-N-acetylglucosaminyltransferase 2 (B3GNT2), mRNA	protein amino acid glycosylation	2.83475	6.74962
NM_002010	Homo sapiens fibroblast growth factor 9 (FGF9), mRNA	cell-cell signaling	2.83427	4.83067
NM_030763	Homo sapiens high mobility group nucleosome binding domain 5 (HMGN5), mRNA	nucleosomal binding and transcriptional activating protein.	2.83386	3.35352
NM_020532	Homo sapiens reticulon 4 (RTN4), transcript variant 1, mRNA	metabolism	2.83099	2.28946
NM_004093	Homo sapiens ephrin-B2 (EFNB2), mRNA	cell-cell signaling	2.82941	4.27554
NM_016270	Homo sapiens Kruppel-like factor 2 (lung) (KLF2), mRNA	regulation of transcription, DNA-dependent	2.82902	2.66606
NM_003673	Homo sapiens titin-cap (TCAP), mRNA	protein complex assembly	2.8238	2.40723
NM_020731	Homo sapiens aryl-hydrocarbon receptor repressor (AHRR), transcript variant 1, mRNA	electron transport	2.82345	3.75795
NM_014904	Homo sapiens RAB11 family interacting protein 2 (class I) (RAB11FIP2), mRNA	metabolism	2.8232	3.35994
NM_025034	Homo sapiens hypothetical protein FLJ21290 (FLJ21290), mRNA	unknown	2.81734	2.18356
NM_022040	Homo sapiens linker for activation of T cells family, member 2 (LAT2), transcript variant 1, mRNA	unknown	2.81585	2.22205
NM_000214	Homo sapiens jagged 1 (Alagille syndrome) (JAG1), mRNA.	cell communication	2.81296	3.18592
AK055932	Homo sapiens cDNA FLJ31370 fis, clone NB9N42000122	unknown	2.8116	3.51554
AK092555	Homo sapiens cDNA FLJ35236 fis, clone PROST2001636	unknown	2.8068	2.96934
NM_004438	Homo sapiens EPH receptor A4 (EPHA4), mRNA	transmembrane receptor protein tyrosine kinase signaling pathway	2.80538	4.4341
NM_019018	Homo sapiens family with sequence similarity 105, member A (FAM105A), mRNA	unknown	2.80274	3.77307
NM_014661	Homo sapiens family with sequence similarity 53, member B (FAM53B), mRNA	regulation of cell growth	2.79018	2.21379
NM_004772	Homo sapiens neuronal regeneration related protein (NREP), transcript variant 1, mRNA	neural regeneration	2.78953	2.55831
NM_014867	Homo sapiens kelch repeat and BTB (POZ) domain containing 11 (KBTBD11), mRNA	physiological processes	2.78559	2.73061
BC016962	Homo sapiens, clone IMAGE:4182947, mRNA	unknown	2.78089	3.65603
AL713719	Homo sapiens mRNA; cDNA DKFZp667K1916 (from clone DKFZp667K1916)	unknown	2.77977	2.14557
NM_014683	Homo sapiens unc-51 like autophagy activating kinase 2 (ULK2), transcript variant 1, mRNA	protein amino acid phosphorylation	2.77955	4.56237
NM_005354	Homo sapiens jun D proto-oncogene (JUND), mRNA	regulation of transcription from Pol II promoter	2.77842	2.29182
NM_024998	Homo sapiens hypothetical protein FLJ12704 (FLJ12704), mRNA	unknown	2.77538	3.17979
NM_016932	Homo sapiens SIX homeobox 2 (SIX2), mRNA	regulation of transcription, DNA-dependent	2.76758	2.76205
NM_001037	Homo sapiens sodium channel, voltage-gated, type I, beta subunit (SCN1B), transcript variant a, mRNA	sodium ion transport	2.76298	4.52167
AB040944	Homo sapiens mRNA for KIAA1511 protein, partial cds	unknown	2.7626	2.54096
AB055227	Homo sapiens MMAA mRNA for hLAT1-3TM, complete cds	pseudo gene	2.76064	3.09262
NM_152451	Homo sapiens myocardial zonula adherens protein (MYZAP), transcript variant 2, mRNA	activator of Rho-dependent serum-response factor signaling	2.76024	2.15922
AL109698	Homo sapiens mRNA full length insert cDNA clone EUROIMAGE 26539	unknown	2.75388	2.82124
NM_004293	Homo sapiens guanine deaminase (GDA), transcript variant 2, mRNA	metabolism	2.75215	3.04279
NM_015710	Homo sapiens glioma tumor suppressor candidate region gene 2 (GLTSCR2), mRNA	unknown	2.749	7.76611
NM_017961	Homo sapiens hypothetical protein FLJ20813 (FLJ20813), mRNA	unknown	2.74713	2.64787
AK092552	Homo sapiens cDNA FLJ35233 fis, clone PROST2001540	unknown	2.74548	3.77348
NM_014920	Homo sapiens intestinal cell (MAK-like) kinase (ICK), transcript variant 1, mRNA	protein amino acid phosphorylation	2.74216	4.33867
NM_001914	Homo sapiens cytochrome b5 type A (microsomal) (CYB5A), transcript variant 2, mRNA	electron transport	2.72868	5.90619
NM_001845	Homo sapiens collagen, type IV, alpha 1 (COL4A1), mRNA	cell adhesion	2.72854	3.47912
NM_024978	Homo sapiens hypothetical protein FLJ12121 (FLJ12121), mRNA	unknown	2.7195	2.2704
NM_013263	Homo sapiens bromodomain containing 7 (BRD7), transcript variant 2, mRNA	transcriptional regulator (in chromatin remodeling)	2.71364	4.64117
AK057411	Homo sapiens cDNA FLJ32849 fis, clone TESTI2003418	unknown	2.70876	2.35596
NM_013450	Homo sapiens bromodomain adjacent to zinc finger domain, 2B (BAZ2B), mRNA	regulation of transcrintion, DNA-dependent	2.70642	4.09011
AK098314	Homo sapiens cDNA FLJ40995 fis, clone UTERU2015830	induction of apoptosis	2.69796	6.12236
AK094565	Homo sapiens cDNA FLJ37246 fis, clone BRAMY2006092, weakly similar to Transporter reduced in osteosclerosis	unknown	2.69008	3.14494
AK001838	Homo sapiens cDNA FLJ10976 fis, clone PLACE1001399	unknown	2.68971	2.94796
NM_000700	Homo sapiens annexin A1 (ANXA1), mRNA	lipid metabolism	2.68183	2.29071
NM_138346	Homo sapiens KIAA2013 (KIAA2013), mRNA	unknown	2.67918	4.92735
NM_016154	Homo sapiens RAB4B, member RAS oncogene family (RAB4B), mRNA	small GTPase mediated signal transduction	2.67798	3.38012
NM_014694	Homo sapiens ADAMTS-like 2 (ADAMTSL2), transcript variant 1, mRNA	proteolysis and peptidolysis	2.6778	3.35672
AK098699	Homo sapiens cDNA FLJ25833 fis, clone TST08193	unknown	2.67266	2.36592
AW510657	hc89b09.x1 Soares_NFL_T_GBC_S1 Homo sapiens cDNA clone IMAGE:2907161 3-, mRNA sequence	unknown	2.67015	6.0636
NM_015633	Homo sapiens FGFR1 oncogene partner 2 (FGFR1OP2), transcript variant 1, mRNA	unknown	2.66914	5.81213
AK092490	Homo sapiens cDNA FLJ35171 fis, clone PLACE6013220, weakly similar to TRICHOHYALIN	unknown	2.66625	2.52754
BG436423	602509088F1 NIH_MGC_79 Homo sapiens cDNA clone IMAGE:4619781 5-, mRNA sequence	unknown	2.66566	2.83247
AK023607	Homo sapiens cDNA FLJ13545 fis, clone PLACE1006867	unknown	2.66489	2.14541
D17289	Human HepG2 3' region MboI cDNA, clone hmd6h07m3.	protein biosynthesis	2.65803	4.868
AK022759	Homo sapiens cDNA FLJ12697 fis, clone NT2RP1000522, weakly similar to UBIQUITIN CARBOXYL-TERMINAL HYDROLASE DUB-1 (EC 3.1.2.15).	ubiquitin-dependent protein catabolism	2.65752	4.54848
AK024885	Homo sapiens cDNA: FLJ21232 fis, clone COL00752.	unknown	2.65715	5.1827
NM_004364	Homo sapiens CCAAT/enhancer binding protein (C/EBP), alpha (CEBPA), mRNA.	regulation of transcrintion, DNA-dependent	2.65658	3.32184
BC036054	Homo sapiens, clone MGC:33382 IMAGE:5273569, mRNA, complete cds.	unknown	2.65617	2.90365
NM_000743	Homo sapiens cholinergic receptor, nicotinic, alpha 3 (neuronal) (CHRNA3), transcript variant 1, mRNA	electron transport	2.65199	2.4216
NM_000524	Homo sapiens 5-hydroxytryptamine (serotonin) receptor 1A (HTR1A), mRNA.	G-protein coupled receptor protein signaling pathway	2.645	2.47245
AF086341	Homo sapiens full length insert cDNA clone ZD60D04.	unknown	2.62207	3.62713
NM_004490	Homo sapiens growth factor receptor-bound protein 14 (GRB14), mRNA.	signal transduction	2.61459	2.78631
NM_001321	Homo sapiens cysteine and glycine-rich protein 2 (CSRP2), mRNA.	cell growth	2.60905	5.29857
AF086027	Homo sapiens full length insert cDNA clone YW24B11	unknown	2.6056	2.29336
NM_130785	Homo sapiens TPTE and PTEN homologous inositol lipid phosphatase (TPIP), mRNA.	protein amino acid dephosphorylation	2.60401	2.04538
AK095145	Homo sapiens cDNA FLJ37826 fis, clone BRSSN2006133.	unknown	2.6003	3.00092
AK022936	Homo sapiens cDNA FLJ12874 fis, clone NT2RP2003769.	unknown	2.59913	2.07274
NM_022566	Homo sapiens mesoderm development candidate 1 (MESDC1), mRNA	cell motility	2.59827	2.19473
NM_021784	Homo sapiens forkhead box A2 (FOXA2), transcript variant 1, mRNA.	regulation of transcrintion, DNA-dependent	2.59728	2.95858
X74862	H.sapiens HPX-5 mRNA.	regulation of transcription, DNA-dependent	2.58803	4.08053
AF075112	Homo sapiens full length insert cDNA YU76E12.	unknown	2.58121	2.43236
NM_001021	Homo sapiens ribosomal protein S17 (RPS17), mRNA.	protein biosynthesis	2.5811	4.63917
AK023784	Homo sapiens cDNA FLJ13722 fis, clone PLACE2000455.	Unknown	2.57783	6.49777
NM_004796	Homo sapiens neurexin 3 (NRXN3), transcript variant alpha, mRNA.	cell adhesion	2.575	4.66988
NM_001003	Homo sapiens ribosomal protein, large, P1 (RPLP1), mRNA.	translational elongation	2.56383	5.47556
NM_152471	Homo sapiens hypothetical protein MGC17515 (MGC17515), mRNA.	Unknown	2.56286	2.58769
BC014017	Homo sapiens, Similar to ribosomal protein L3, clone MGC:20304 IMAGE:4128023, mRNA, complete cds.	protein biosynthesis	2.5611	5.37548
NM_005258	Homo sapiens GTP cyclohydrolase I feedback regulatory protein (GCHFR), mRNA.	Unknown	2.56055	2.48175
NM_014488	Homo sapiens RAB30, member RAS oncogene family (RAB30), mRNA.	small GTPase mediated signal transduction	2.55908	3.35258
BC029120	Homo sapiens, Similar to hypothetical protein FLJ22789, clone MGC:34762 IMAGE:5189049, mRNA, complete cds.	cell adhesion	2.5576	2.53533
NM_014913	Homo sapiens KIAA0863 protein (KIAA0863), mRNA.	regulation of transcription, DNA-dependent	2.55329	2.78178
NM_000991	Homo sapiens ribosomal protein L28 (RPL28), mRNA.	protein biosynthesis	2.55287	5.44215
NM_000346	Homo sapiens SRY (sex determining region Y)-box 9 (campomelic dysplasia, autosomal sex-reversal) (SOX9), mRNA.	regulation of transcription from Pol II promoter	2.54982	3.9005
NM_003852	Homo sapiens transcriptional intermediary factor 1 (TIF1), mRNA.	regulation of transcription, DNA-dependent	2.53907	3.45823
NM_000979	Homo sapiens ribosomal protein L18 (RPL18), mRNA.	protein biosynthesis	2.52613	4.1329
NM_012234	Homo sapiens RING1 and YY1 binding protein (RYBP), mRNA.	development	2.51353	2.57537
NM_018137	Homo sapiens protein arginine N-methyltransferase 6 (PRMT6), mRNA.	Unknown	2.50299	3.82842
NM_014583	Homo sapiens LIM and cysteine-rich domains 1 (LMCD1), mRNA.	Unknown	2.49585	4.26386
AK074131	Homo sapiens mRNA for FLJ00204 protein.	Unknown	2.49407	4.2733
NM_017865	Homo sapiens hypothetical protein FLJ20531 (FLJ20531), mRNA.	electron transport	2.49276	2.98239
NM_002417	Homo sapiens antigen identified by monoclonal antibody Ki-67 (MKI67), mRNA.	regulation of cell cycle	2.49264	3.28002
AF086414	Homo sapiens full length insert cDNA clone ZD77F06.	Unknown	2.48735	4.43295
NM_032432	Homo sapiens actin binding LIM protein 2 (ABLIM2), mRNA.	cytoskeleton organization and biogenesis	2.48426	3.60142
NM_006943	Homo sapiens SRY (sex determining region Y)-box 12 (SOX12), mRNA.	regulation of transcription, DNA-dependent	2.48401	5.32242
NM_016339	Homo sapiens Link guanine nucleotide exchange factor II (Link-GEFII), mRNA.	intracellular signaling cascade	2.47532	3.94219
NM_172127	Homo sapiens calcium/calmodulin-dependent protein kinase (CaM kinase) II delta (CAMK2D), transcript variant 1, mRNA.	protein amino acid phosphorylation	2.4717	2.28666
AL577971	AL577971 Homo sapiens HELA CELLS COT 25-NORMALIZED Homo sapiens cDNA clone CS0DK008YM22 3-PRIME, mRNA sequence	Unknown	2.46988	3.86672
BC035808	Homo sapiens KIAA1543, mRNA (cDNA clone IMAGE:5745021), with apparent retained intron	unknown	2.46216	2.02671
NM_001353	Homo sapiens aldo-keto reductase family 1, member C1 (dihydrodiol dehydrogenase 1; 20-alpha (3-alpha)-hydroxysteroid dehydrogenase) (AKR1C1), mRNA.	lipid metabolism	2.46052	3.29848
NM_057175	Homo sapiens N(alpha)-acetyltransferase 15, NatA auxiliary subunit (NAA15), mRNA	protein amino acid acetylation	2.45885	3.11195
NM_014803	Homo sapiens KIAA0335 gene product (KIAA0335), mRNA.	negative regulation of transcription from Pol II promoter	2.44739	2.30628
AL833464	Homo sapiens mRNA; cDNA DKFZp686B0917 (from clone DKFZp686B0917).	Unknown	2.44583	2.56564
NM_001965	Homo sapiens early growth response 4 (EGR4), mRNA.	regulation of transcription, DNA-dependent	2.44524	2.97282
NM_007233	Homo sapiens TP53 target gene 1 (TP53TG1), mRNA.	response to stress	2.44459	2.41665
AK095464	Homo sapiens cDNA FLJ38145 fis, clone D9OST2003580.	Unknown	2.44349	2.01604
AB011178	Homo sapiens mRNA for KIAA0606 protein, partial cds.	protein amino acid dephosphorylation	2.44216	2.46568
AL832786	Homo sapiens mRNA; cDNA DKFZp667D2123 (from clone DKFZp667D2123).	Unknown	2.4416	3.67515
AK056222	Homo sapiens cDNA FLJ31660 fis, clone NT2RI2004410.	Unknown	2.44134	2.77658
NM_005911	Homo sapiens methionine adenosyltransferase II, alpha (MAT2A), mRNA.	one-carbon compound metabolism	2.43725	3.47104
NM_014969	Homo sapiens KIAA0893 protein (KIAA0893), mRNA.	peroxidase reaction	2.43462	2.1719
NM_144633	Homo sapiens potassium voltage-gated channel, subfamily H (eag-related), member 8 (KCNH8), mRNA.	potassium ion transport	2.43012	2.05043
BQ214665	AGENCOURT_7504507 NIH_MGC_72 Homo sapiens cDNA clone IMAGE:6049909 5', mRNA sequence.	regulation of transcription, DNA-dependent	2.42703	2.13334
NM_001186	Homo sapiens BTB and CNC homology 1, basic leucine zipper transcription factor 1 (BACH1), mRNA.	regulation of transcription, DNA-dependent	2.42604	4.80689
S64937	Ig alpha VDJ {CDR3} [human, tumor isotype M42, mRNA Partial Mutant, 93 nt]	unknown	2.42066	3.27154
BC032409	Homo sapiens, similar to hypothetical protein FLJ11531, clone IMAGE:5217021, mRNA.	Unknown	2.41678	4.01016
BM546166	AGENCOURT_6505294 NIH_MGC_125 Homo sapiens cDNA clone IMAGE:5588611 5', mRNA sequence.	unknown	2.41575	2.29806
NM_022748	Homo sapiens tumor endothelial marker 6 (TEM6), mRNA.	protein amino acid dephosphorylation	2.41401	5.1015
NM_139207	Homo sapiens nucleosome assembly protein 1-like 1 (NAP1L1), transcript variant 1, mRNA.	DNA metabolism	2.40789	7.03029
NM_153186	Homo sapiens kidney ankyrin repeat-containing protein (KANK), transcript variant 2, mRNA.	proteolysis and peptidolysis	2.40194	3.65238
NM_016535	Homo sapiens HSPC189 protein (HSPC189), mRNA.	regulation of transcription, DNA-dependent	2.40144	4.19996
AW085208	xe07c02.x1 Soares_NFL_T_GBC_S1 Homo sapiens cDNA clone IMAGE:2606402 3' similar to SW:IRX2_HUMAN P78411 IROQUOIS-CLASS HOMEODOMAIN PROTEIN IRX-2. ;, mRNA sequence.	regulation of transcription, DNA-dependent	2.40035	3.24454
NM_152304	Homo sapiens hypothetical protein MGC45806 (MGC45806), mRNA.	small GTPase mediated signal transduction	2.3983	3.06083
NM_012423	Homo sapiens ribosomal protein L13a (RPL13A), mRNA.	protein biosynthesis	2.39507	4.71666
NM_005907	Homo sapiens mannosidase, alpha, class 1A, member 1 (MAN1A1), mRNA.	N-linked glycosylation	2.39379	5.1691
BC033116	Homo sapiens, clone IMAGE:3352674, mRNA.	chromatin assembly/disassembly	2.38563	4.50669
AK054893	Homo sapiens cDNA FLJ30331 fis, clone BRACE2007232.	unknown	2.38338	2.06879
AL833579	Homo sapiens mRNA; cDNA DKFZp686L0256 (from clone DKFZp686L0256).	unknown	2.38319	2.31509
BC030557	Homo sapiens, clone MGC:40430 IMAGE:5218944, mRNA, complete cds.	unknown	2.38199	3.66529
NM_005839	Homo sapiens serine/arginine repetitive matrix 1 (SRRM1), mRNA.	mRNA splicing	2.38192	3.36368
NM_017858	Homo sapiens hypothetical protein FLJ20516 (FLJ20516), mRNA.	protein biosynthesis	2.38122	3.74519
NM_005124	Homo sapiens nucleoporin 153kDa (NUP153), mRNA.	transport	2.3787	3.02869
NM_017817	Homo sapiens RAB20, member RAS oncogene family (RAB20), mRNA.	small GTPase mediated signal transduction	2.3776	4.35257
NM_001032	Homo sapiens ribosomal protein S29 (RPS29), mRNA.	protein biosynthesis	2.37552	7.91261
NM_005714	Homo sapiens potassium channel, subfamily K, member 7 (KCNK7), transcript variant C, mRNA.	potassium ion transport	2.37219	2.20201
BC040629	Homo sapiens, clone IMAGE:5745636, mRNA.	unknown	2.37147	2.44278
NM_138375	Homo sapiens hypothetical protein BC004124 (LOC91768), mRNA.	neurogenesis	2.37132	3.03379
NM_014789	Homo sapiens KIAA0628 gene product (KIAA0628), mRNA.	regulation of transcription, DNA-dependent	2.37018	3.06834
NM_006780	Homo sapiens SMA3 (SMA3), mRNA.	anti-apoptosis	2.36962	2.36156
BC009209	Homo sapiens cDNA clone IMAGE:3635034, partial cds	unknown	2.3692	2.24076
AK021717	Homo sapiens cDNA FLJ11655 fis, clone HEMBA1004554.	unknown	2.36912	2.71458
CA440793	UI-H-DT1-awi-m-10-0-UI.s1 NCI_CGAP_DT1 Homo sapiens cDNA clone UI-H-DT1-awi-m-10-0-UI 3', mRNA sequence.	unknown	2.36827	3.41373
NM_003131	Homo sapiens serum response factor (c-fos serum response element-binding transcription factor) (SRF), mRNA.	regulation of transcription, DNA-dependent	2.36797	5.29772
AI798818	we93a11.x1 Soares_NFL_T_GBC_S1 Homo sapiens cDNA clone IMAGE:2348636 3-, mRNA sequence	unknown	2.36549	2.66486
BF969970	602272594F1 NIH_MGC_84 Homo sapiens cDNA clone IMAGE:4360846 5', mRNA sequence.	unknown	2.36422	2.22458
NM_022551	Homo sapiens ribosomal protein S18 (RPS18), mRNA.	protein biosynthesis	2.36227	4.2907
NM_144687	Homo sapiens leucine-rich-repeat protein (RNO2), mRNA.	apoptosis	2.35678	2.76457
NM_017993	Homo sapiens hypothetical protein FLJ10094 (FLJ10094), mRNA.	regulation of transcription, DNA-dependent	2.35332	2.48558
NM_000426	Homo sapiens laminin, alpha 2 (merosin, congenital muscular dystrophy) (LAMA2), mRNA.	cell adhesion	2.35289	2.42294
AB007928	Homo sapiens mRNA for KIAA0459 protein, partial cds.	unknown	2.34547	3.44677
NM_021622	Homo sapiens pleckstrin homology domain containing, family A (phosphoinositide binding specific) member 1 (PLEKHA1), mRNA.	unknown	2.34128	2.87759
BM456761	AGENCOURT_6404069 NIH_MGC_92 Homo sapiens cDNA clone IMAGE:5583659 5', mRNA sequence.	unknown	2.33879	2.91529
AB011116	Homo sapiens mRNA for KIAA0544 protein, partial cds.	proteolysis and peptidolysis	2.33828	4.75399
AK055922	Homo sapiens cDNA FLJ31360 fis, clone MESAN2000572.	unknown	2.33443	2.04244
AK027199	Homo sapiens cDNA: FLJ23546 fis, clone LNG08361.	unknown	2.33285	2.96448
NM_014585	Homo sapiens solute carrier family 11 (proton-coupled divalent metal ion transporters), member 3 (SLC11A3), mRNA.	iron ion transport	2.33178	2.83162
NM_018902	Homo sapiens protocadherin alpha 11 (PCDHA11), transcript variant 1, mRNA.	homophilic cell adhesion	2.33062	2.80082
BF107283	601824180F1 NIH_MGC_79 Homo sapiens cDNA clone IMAGE:4044139 5', mRNA sequence.	unknown	2.32963	2.35132
NM_006186	Homo sapiens nuclear receptor subfamily 4, group A, member 2 (NR4A2), mRNA.	regulation of transcription, DNA-dependent	2.32858	2.99523
NM_057158	Homo sapiens dual specificity phosphatase 4 (DUSP4), transcript variant 2, mRNA.	protein amino acid dephosphorylation	2.32792	2.75647
NM_080833	Homo sapiens chromosome 20 open reading frame 151 (C20orf151), mRNA.	unknown	2.32535	3.18556
NM_013390	Homo sapiens transmembrane protein 2 (TMEM2), mRNA.	N-linked glycosylation	2.32129	4.72161
NM_006159	Homo sapiens NEL-like 2 (chicken) (NELL2), mRNA.	cell adhesion	2.3211	4.40528
NM_002519	Homo sapiens nuclear protein, ataxia-telangiectasia locus (NPAT), mRNA.	chemotaxis	2.32062	2.13333
NM_138553	Homo sapiens B-cell CLL/lymphoma 11A (zinc finger protein) (BCL11A), transcript variant 5, mRNA.	regulation of transcription, DNA-dependent	2.32023	2.4575
NM_000895	Homo sapiens leukotriene A4 hydrolase (LTA4H), mRNA.	proteolysis and peptidolysis	2.31933	6.61564
BC037348	Homo sapiens, clone IMAGE:5266245, mRNA.	Golgi organization and biogenesis	2.31119	2.64296
NM_016014	Homo sapiens CGI-67 protein (CGI-67), mRNA.	transport	2.30645	3.12454
NM_032804	Homo sapiens hypothetical protein FLJ14547 (FLJ14547), mRNA.	unknown	2.30578	3.98909
AB051464	Homo sapiens mRNA for KIAA1677 protein, partial cds.	physiological processes	2.30345	4.19404
NM_003068	Homo sapiens snail family zinc finger 2 (SNAI2), mRNA	transcription factor	2.30041	3.82881
AL110177	Homo sapiens mRNA; cDNA DKFZp564C0762 (from clone DKFZp564C0762)	unknown	2.29978	2.26485
BQ016329	UI-H-DT1-awb-j-06-0-UI.s1 NCI_CGAP_DT1 Homo sapiens cDNA clone IMAGE:5887205 3', mRNA sequence.	unknown	2.29904	4.34947
AF119917	Homo sapiens PRO3098 mRNA, complete cds.	unknown	2.299	2.22327
NM_013293	Homo sapiens transformer-2 alpha (htra-2 alpha) (HSU53209), mRNA.	mRNA splicing	2.29664	4.42283
NM_004164	Homo sapiens retinol binding protein 2, cellular (RBP2), mRNA.	transport	2.29438	2.63013
NM_017711	Homo sapiens hypothetical protein FLJ20207 (FLJ20207), mRNA.	glycerol metabolism	2.28529	2.30786
NM_000171	Homo sapiens glycine receptor, alpha 1 (startle disease/hyperekplexia, stiff man syndrome) (GLRA1), mRNA.	cellular process	2.28036	3.85539
AK024455	Homo sapiens mRNA for FLJ00047 protein, partial cds.	unknown	2.27818	2.59142
NM_031280	Homo sapiens mitochondrial ribosomal protein S15 (MRPS15), nuclear gene encoding mitochondrial protein, mRNA.	protein biosynthesis	2.27784	3.83734
BC041168	Homo sapiens, Similar to RIKEN cDNA 9230102M18 gene, clone MGC:48935 IMAGE:5165480, mRNA, complete cds.	transport	2.27336	4.06993
NM_018285	Homo sapiens chromosome 15 open reading frame 12 (C15orf12), nuclear gene encoding mitochondrial protein, mRNA.	protein biosynthesis	2.27054	4.15079
AK093543	Homo sapiens cDNA FLJ36224 fis, clone THYMU2000990.	protein biosynthesis	2.26757	4.00177
BC002581	Homo sapiens, DKFZp434A0131 protein, clone MGC:1130 IMAGE:3160366, mRNA, complete cds.	unknown	2.26723	2.69341
NM_018849	Homo sapiens ATP-binding cassette, sub-family B (MDR/TAP), member 4 (ABCB4), transcript variant B, mRNA.	transport	2.26338	2.48342
NM_080599	Homo sapiens regulator of nonsense transcripts 2 (RENT2), transcript variant 1, mRNA.	protein biosynthesis	2.26316	3.2318
NM_001046	Homo sapiens solute carrier family 12 (sodium/potassium/chloride transporters), member 2 (SLC12A2), mRNA.	physiological processes	2.26297	4.20378
BC036463	Homo sapiens cDNA clone IMAGE:4826885	unknown	2.25885	3.71385
NM_138448	Homo sapiens acylphosphatase 2, muscle type (ACYP2), mRNA.	phosphate metabolism	2.2581	3.66484
BC010013	Homo sapiens metal response element binding transcription factor 2, mRNA (cDNA clone MGC:15320 IMAGE:4308565), complete cds	transcription factor	2.25721	2.62358
NM_015169	Homo sapiens homolog of yeast ribosome biogenesis regulatory protein RRS1 (RRS1), mRNA.	unknown	2.25455	2.2347
NM_024685	Homo sapiens hypothetical protein FLJ23560 (FLJ23560), mRNA.	unknown	2.25308	2.51186
NM_031464	Homo sapiens hypothetical protein MGC11287 similar to ribosomal protein S6 kinase , (MGC11287), mRNA.	protein amino acid phosphorylation	2.25259	2.04264
NM_033518	Homo sapiens solute carrier family 38, member 5 (SLC38A5), mRNA.	amino acid transport	2.24931	3.20122
NM_021029	Homo sapiens ribosomal protein L36A (RPL36A), mRNA.	protein biosynthesis	2.24889	4.68548
AK092475	Homo sapiens cDNA FLJ35156 fis, clone PLACE6011057.	regulation of transcription from Pol II promoter	2.24834	2.44282
BG260096	602371682F1 NIH_MGC_93 Homo sapiens cDNA clone IMAGE:4479692 5', mRNA sequence.	unknown	2.24675	2.33032
AK094108	Homo sapiens cDNA FLJ36789 fis, clone ADRGL2004459.	unknown	2.24651	2.58701
BC013031	Homo sapiens, clone MGC:4704 IMAGE:3534425, mRNA, complete cds.	protein biosynthesis	2.24437	3.90642
NM_001025	Homo sapiens ribosomal protein S23 (RPS23), mRNA.	protein biosynthesis	2.24345	4.45941
BF508702	UI-H-BI4-aop-g-05-0-UI.s1 NCI_CGAP_Sub8 Homo sapiens cDNA clone IMAGE:3085641 3', mRNA sequence.	unknown	2.24341	2.27926
NM_018120	Homo sapiens hypothetical protein FLJ10511 (FLJ10511), mRNA.	gametogenesis	2.24291	2.92258
NM_002107	Homo sapiens H3 histone, family 3A (H3F3A), mRNA.	nucleosome assembly	2.24046	4.81765
NM_153234	Homo sapiens hypothetical protein FLJ25534 (FLJ25534), mRNA.	unknown	2.23782	2.10965
AB007877	Homo sapiens KIAA0417 mRNA, complete cds.	response to heat	2.23735	5.11497
AK057205	Homo sapiens cDNA FLJ32643 fis, clone SYNOV2001212.	unknown	2.23225	4.35281
X57958	H.sapiens mRNA for ribosomal protein L7.	protein biosynthesis	2.2291	6.76625
NM_005360	Homo sapiens v-maf musculoaponeurotic fibrosarcoma oncogene homolog (avian) (MAF), mRNA.	regulation of transcription, DNA-dependent	2.22686	2.25791
NM_002954	Homo sapiens ribosomal protein S27a (RPS27A), mRNA.	protein modification	2.2261	5.11169
NM_006910	Homo sapiens retinoblastoma binding protein 6 (RBBP6), mRNA.	regulation of cell cycle	2.2241	2.30207
NM_017675	Homo sapiens protocadherin LKC (PC-LKC), mRNA.	homophilic cell adhesion	2.22282	2.64874
NM_018932	Homo sapiens protocadherin beta 12 (PCDHB12), mRNA.	homophilic cell adhesion	2.21947	2.56726
AF147408	Homo sapiens full length insert cDNA clone YP58A11.	unknown	2.21882	3.99595
AL136736	Homo sapiens mRNA; cDNA DKFZp434O0710 (from clone DKFZp434O0710); complete cds.	regulation of transcription, DNA-dependent	2.21297	2.51054
NM_003226	Homo sapiens trefoil factor 3 (intestinal) (TFF3), mRNA	defense response	2.21246	2.68947
NM_005222	Homo sapiens distal-less homeo box 6 (DLX6), mRNA.	regulation of transcription, DNA-dependent	2.21222	2.66397
NM_018029	Homo sapiens hypothetical protein FLJ10213 (FLJ10213), mRNA.	unknown	2.21162	2.52372
BU681294	UI-CF-EC1-abv-i-02-0-UI.s1 UI-CF-EC1 Homo sapiens cDNA clone UI-CF-EC1-abv-i-02-0-UI 3', mRNA sequence.	unknown	2.20724	2.0487
NM_001359	Homo sapiens 2,4-dienoyl CoA reductase 1, mitochondrial (DECR1), nuclear gene encoding mitochondrial protein, mRNA.	metabolism	2.20462	4.96305
AK058039	Homo sapiens cDNA FLJ25310 fis, clone SYN00991.	unknown	2.20399	2.53764
NM_032287	Homo sapiens hypothetical protein DKFZp761O17121 (DKFZp761O17121), mRNA.	unknown	2.20211	5.205
NM_144661	Homo sapiens hypothetical protein MGC33547 (MGC33547), mRNA.	unknown	2.20058	2.14987
NM_152357	Homo sapiens zinc finger protein 440 (ZNF440), mRNA	regulation of transcription, DNA-dependent	2.20008	4.31628
NM_078467	Homo sapiens cyclin-dependent kinase inhibitor 1A (p21, Cip1) (CDKN1A), transcript variant 2, mRNA.	induction of apoptosis by intracellular signals	2.19702	2.77749
AK021969	Homo sapiens cDNA FLJ11907 fis, clone HEMBB1000059	unknown	2.19534	3.05337
AF146695	Homo sapiens clone IMAGE:120162 mRNA sequence.	unknown	2.19498	2.58244
BC011891	Homo sapiens, clone MGC:20563 IMAGE:3940399, mRNA, complete cds.	phototransduction	2.19104	3.29257
BC015142	Homo sapiens, clone IMAGE:4043205, mRNA.	unknown	2.18994	2.40624
AL833694	Homo sapiens mRNA; cDNA DKFZp667C029 (from clone DKFZp667C029).	RNA dependent DNA replication	2.18888	3.73258
AK092941	Homo sapiens cDNA FLJ35622 fis, clone SPLEN2010978.	cytoskeleton organization and biogenesis	2.18852	2.64716
NM_152529	Homo sapiens hypothetical protein FLJ31819 (FLJ31819), mRNA.	intracellular signaling cascade	2.18427	3.33572
NM_152789	Homo sapiens hypothetical protein MGC40405 (MGC40405), mRNA.	unknown	2.18247	3.56551
NM_000527	Homo sapiens low density lipoprotein receptor (familial hypercholesterolemia) (LDLR), mRNA.	cholesterol metabolism	2.17745	4.17775
AB011100	Homo sapiens mRNA for KIAA0528 protein, partial cds.	transport	2.17679	3.10538
NM_152386	Homo sapiens sphingosine 1-phosphate phosphohydrolase 2 (SPP2), mRNA.	sphingolipid metabolism	2.17541	2.13998
NM_139021	Homo sapiens extracellular signal-regulated kinase 8 (ERK8), mRNA.	protein amino acid phosphorylation	2.17281	3.48293
NM_003385	Homo sapiens visinin-like 1 (VSNL1), mRNA.	central nervous system development	2.16849	3.99715
AL831917	Homo sapiens mRNA; cDNA DKFZp761F0118 (from clone DKFZp761F0118).	unknown	2.16561	2.15432
BC039421	Homo sapiens, clone IMAGE:5302575, mRNA.	unknown	2.16333	2.60771
AK090566	Homo sapiens cDNA FLJ33247 fis, clone ASTRO2004974.	unknown	2.16116	3.91622
AK075365	Homo sapiens cDNA PSEC0052 fis, clone NT2RP2000279, weakly similar to AQUALYSIN I PRECURSOR (EC 3.4.21.-).	proteolysis and peptidolysis	2.16034	2.9729
AK021753	Homo sapiens cDNA FLJ11691 fis, clone HEMBA1004980.	unknown	2.15964	6.6394
AL833344	Homo sapiens mRNA; cDNA DKFZp686J0234 (from clone DKFZp686J0234).	calcium ion homeostasis	2.15848	3.59443
NM_003318	Homo sapiens TTK protein kinase (TTK), mRNA.	protein amino acid phosphorylation	2.1559	2.08068
AB040962	Homo sapiens mRNA for KIAA1529 protein, partial cds.	cell growth and/or maintenance	2.15182	2.64762
NM_032027	Homo sapiens beta-amyloid binding protein precursor (BBP), mRNA.	induction of apoptosis by extracellular signals	2.1503	3.79584
NM_019002	Homo sapiens ETAA16 protein (ETAA16), mRNA.	chemotaxis	2.14959	2.28547
NM_002948	Homo sapiens ribosomal protein L15 (RPL15), transcript variant 1, mRNA	protein biosynthesis	2.14908	5.397
NM_014676	Homo sapiens pumilio homolog 1 (Drosophila) (PUM1), mRNA.	unknown	2.14757	2.94503
BC007118	Homo sapiens, clone IMAGE:4334394, mRNA.	unknown	2.14677	2.58599
AK094887	Homo sapiens cDNA FLJ37568 fis, clone BRCOC2002323.	RNA dependent DNA replication	2.1442	3.59932
NM_006013	Homo sapiens ribosomal protein L10 (RPL10), mRNA.	protein biosynthesis	2.14331	2.62534
AK091213	Homo sapiens cDNA FLJ33894 fis, clone CTONG2007776, weakly similar to SYNAPSIN I.	unknown	2.14093	2.17654
AK024964	Homo sapiens cDNA: FLJ21311 fis, clone COL02167.	regulation of transcription, DNA-dependent	2.14009	94.1353
NM_144571	Homo sapiens CCR4-NOT transcription complex, subunit 6-like (CNOT6L), mRNA.	regulation of transcription, DNA-dependent	2.13639	2.84629
NM_153358	Homo sapiens hypothetical protein FLJ90396 (FLJ90396), mRNA.	regulation of transcription, DNA-dependent	2.13433	3.22052
BC035818	Homo sapiens, clone MGC:46330 IMAGE:5554765, mRNA, complete cds.	chromatin modeling	2.13428	2.9147
NM_005104	Homo sapiens bromodomain containing 2 (BRD2), transcript variant 1, mRNA	transcriptional regulator ( in spermatogenesis )	2.12967	2.05065
BC036948	Homo sapiens, clone IMAGE:5503346, mRNA.	N-linked glycosylation	2.12837	2.79418
AK027693	Homo sapiens cDNA FLJ14787 fis, clone NT2RP4000878, highly similar to MYELOID UPREGULATED PROTEIN.	unknown	2.12649	4.15402
AL832465	Homo sapiens mRNA; cDNA DKFZp313L231 (from clone DKFZp313L231).	cell cycle	2.12573	2.38558
NM_080596	Homo sapiens histone family member (H2A/S), mRNA.	nucleosome assembly	2.12428	4.17031
BC009060	Homo sapiens, clone IMAGE:3867049, mRNA.	unknown	2.12107	2.5376
NM_017666	Homo sapiens hypothetical protein FLJ20095 (FLJ20095), mRNA.	electron transport	2.11809	2.32042
NM_003543	Homo sapiens H4 histone family, member H (H4FH), mRNA.	nucleosome assembly	2.1174	2.51875
NM_033251	Homo sapiens ribosomal protein L13 (RPL13), transcript variant 2, mRNA.	protein biosynthesis	2.1156	3.82131
NM_006454	Homo sapiens MAX dimerization protein 4 (MXD4), mRNA.	negative regulation of transcription from Pol II promoter	2.11374	4.06106
NM_000166	Homo sapiens gap junction protein, beta 1, 32kDa (connexin 32, Charcot-Marie-Tooth neuropathy, X-linked) (GJB1), mRNA.	cell communication	2.10954	4.63684
NM_000998	Homo sapiens ribosomal protein L37a (RPL37A), mRNA.	protein biosynthesis	2.10767	3.86169
NM_021178	Homo sapiens enhancer of invasion 10 (HEI10), mRNA.	unknown	2.10644	6.39938
AK026429	Homo sapiens cDNA: FLJ22776 fis, clone KAIA1582.	unknown	2.10425	3.34931
AK075053	Homo sapiens cDNA FLJ90572 fis, clone OVARC1001727.	unknown	2.09831	4.63476
AF330626	Homo sapiens adaptor protein p47phox (NCF1) mRNA, partial cds.	intracellular signaling cascade	2.09794	2.24743
D17257	Human HepG2 3' region MboI cDNA, clone hmd5d04m3.	unknown	2.09574	6.00335
NM_018061	Homo sapiens hypothetical protein FLJ10330 (FLJ10330), mRNA.	mRNA splicing	2.0955	3.70024
AK097091	Homo sapiens cDNA FLJ39772 fis, clone SPLEN2001157, highly similar to H.sapiens SMA4 mRNA.	unknown	2.09375	3.23085
NM_002023	Homo sapiens fibromodulin (FMOD), mRNA.	TGFbeta receptor complex assembly	2.09357	2.41384
BG400849	602464072F1 NIH_MGC_75 Homo sapiens cDNA clone IMAGE:4592488 5', mRNA sequence.	unknown	2.09332	2.25744
D17243	Human HepG2 3' region MboI cDNA, clone hmd4h01m3.	unknown	2.08659	2.79792
BC013276	Homo sapiens, clone IMAGE:3632546, mRNA.	unknown	2.08504	3.12125
NM_002222	Homo sapiens inositol 1,4,5-triphosphate receptor, type 1 (ITPR1), mRNA.	calcium ion transport	2.08321	2.65433
BC039555	Homo sapiens, clone IMAGE:4184613, mRNA.	unknown	2.08266	7.39059
NM_012102	Homo sapiens arginine-glutamic acid dipeptide (RE) repeats (RERE), mRNA.	regulation of transcription, DNA-dependent	2.08257	6.30153
AK054870	Homo sapiens cDNA FLJ30308 fis, clone BRACE2003420.	unknown	2.07506	3.08745
NM_145328	Homo sapiens chromosome 21 open reading frame 66 (C21orf66), transcript variant 3, mRNA.	regulation of transcription, DNA-dependent	2.07462	4.09121
AL832792	Homo sapiens mRNA; cDNA DKFZp667G2423 (from clone DKFZp667G2423).	unknown	2.07329	3.05698
NM_052831	Homo sapiens dJ55C23.6 gene (dJ55C23.6), mRNA.	monoamine transport	2.0728	4.59034
NM_006840	Homo sapiens leukocyte immunoglobulin-like receptor, subfamily B (with TM and ITIM domains), member 5 (LILRB5), mRNA.	cell surface receptor linked signal transduction	2.07212	3.45098
BC026177	Homo sapiens, clone MGC:27348 IMAGE:4671259, mRNA, complete cds.	protein biosynthesis	2.07004	3.91016
AK074108	Homo sapiens mRNA for FLJ00179 protein.	unknown	2.0635	6.62353
AK091817	Homo sapiens cDNA FLJ34498 fis, clone HLUNG2005203.	unknown	2.05709	2.31749
BC015512	Homo sapiens, clone IMAGE:3887266, mRNA.	unknown	2.05689	4.4185
NM_005426	Homo sapiens tumor protein p53 binding protein, 2 (TP53BP2), mRNA.	signal transduction	2.0545	2.68611
AK092438	Homo sapiens cDNA FLJ35119 fis, clone PLACE6007482.	unknown	2.0522	2.70183
NM_018464	Homo sapiens CDGSH iron sulfur domain 1 (CISD1), mRNA	unknown	2.04813	3.75372
NM_016458	Homo sapiens hypothetical protein (LOC51236), mRNA.	unknown	2.04523	2.45006
NM_153215	Homo sapiens hypothetical protein FLJ38608 (FLJ38608), mRNA.	unknown	2.04477	2.06083
NM_006142	Homo sapiens stratifin (SFN), mRNA.	regulation of CDK activity	2.04405	5.46967
NM_000661	Homo sapiens ribosomal protein L9 (RPL9), mRNA.	protein biosynthesis	2.04331	3.53804
NM_021021	Homo sapiens syntrophin, beta 1 (dystrophin-associated protein A1, 59kDa, basic component 1) (SNTB1), mRNA.	intracellular signaling cascade	2.03788	3.65249
D16985	Human HepG2 partial cDNA, clone hmd2b05m5.	protein biosynthesis	2.03645	3.34405
AL832858	Homo sapiens mRNA; cDNA DKFZp667A182 (from clone DKFZp667A182).	unknown	2.03636	2.63569
NM_018087	Homo sapiens hypothetical protein FLJ10407 (FLJ10407), mRNA.	lipid catabolism	2.03478	3.01221
NM_003824	Homo sapiens Fas (TNFRSF6)-associated via death domain (FADD), mRNA.	apoptosis	2.03451	5.1959
NM_025154	Homo sapiens unc-84 homolog A (C. elegans) (UNC84A), mRNA.	microtubule-based process	2.02739	2.8418
AB046765	Homo sapiens mRNA for KIAA1545 protein, partial cds.	protein amino acid phosphorylation	2.0264	3.57548
AJ276257	Homo sapiens partial mRNA, clone c4-1c6.	unknown	2.02468	2.85842
NM_003898	Homo sapiens synaptojanin 2 (SYNJ2), mRNA.	myo-inositol metabolism	2.02417	2.89334
NM_004268	Homo sapiens cofactor required for Sp1 transcriptional activation, subunit 6, 77kDa (CRSP6), mRNA.	regulation of transcription from Pol II promoter	2.02388	3.61025
NM_000883	Homo sapiens IMP (inosine 5'-monophosphate) dehydrogenase 1 (IMPDH1), transcript variant 1, mRNA	GTP biosynthesis	2.02164	2.44391
AK095355	Homo sapiens cDNA FLJ38036 fis, clone CTONG2013630.	unknown	2.01962	2.39654
NM_020248	Homo sapiens catenin, beta interacting protein 1 (CTNNBIP1), mRNA.	development	2.01579	2.77111
NM_002852	Homo sapiens pentaxin-related gene, rapidly induced by IL-1 beta (PTX3), mRNA.	inflammatory response	2.013	3.28477
NM_004814	Homo sapiens U5 snRNP-specific 40 kDa protein (hPrp8-binding) (HPRP8BP), mRNA.	amino acid activation	2.01198	3.04735
NM_024758	Homo sapiens agmatine ureohydrolase (agmatinase) (AGMAT), mRNA.	unknown	2.00929	2.57471
NM_005875	Homo sapiens translation factor sui1 homolog (GC20), mRNA.	translational initiation	2.00635	3.91639
NM_001485	Homo sapiens gastrulation brain homeo box 2 (GBX2), mRNA.	regulation of transcription, DNA-dependent	2.00528	2.65625
D86974	Human mRNA for KIAA0220 gene, partial cds.	lipid metabolism	2.00232	3.1437
