# Supplementary material for: Olfactory Receptor Family 7 Subfamily C Member 1 Is a Novel Marker of Colon Cancer–Initiating Cells and Is a Potent Target of Immunotherapy
Source: Oxford University Press journal article supplement (doi:10.1158/1078-0432.ccr-15-1709), 2016-02-09
Supplement: 10780432ccr151709-sup-152880_2_supp_data_3289361_206h22.xls [file 10780432ccr151709-sup-152880_2_supp_data_3289361_206h22.xls]

## Sheet: tableS1
	Table S2 . Summary of Colon cancer patients
		OR7C1 negative	OR7C1 Low (<15 %)	OR7C1 Mid (<50 %)	OR7C1 High (>=50)
	n	16	40	25	19
	Age	62.5±10.2	65.8±13.7	66.2±13.7	62.0±11.89
	Gender
	male	7	17	17	7
	female	9	23	8	12
	Stage
	early	6	22	12	7
	advance	9	17	13	11
	unknown	1	1	0	1
	Pathological grade
	low	3	5	1	2
	mid	2	15	10	8
	high	11	20	14	9
	Median survival time (mo)	67.3	52.2	45.2	35.3
