# Supplementary material for: Olfactory Receptor Family 7 Subfamily C Member 1 Is a Novel Marker of Colon Cancer–Initiating Cells and Is a Potent Target of Immunotherapy
Source: Oxford University Press journal article supplement (doi:10.1158/1078-0432.ccr-15-1709), 2016-02-09
Supplement: 10780432ccr151709-sup-152880_2_supp_data_3289363_g06hgg.doc [file 10780432ccr151709-sup-152880_2_supp_data_3289363_g06hgg.doc]

**Supplemental Materials and Methods**

**Tissue samples**

Three pairs of frozen colorectal adenocarcinoma and the corresponding non-neoplastic colorectal tissues, which were used on RT-PCR, were obtained from surgically resected tissues removed at Kushiro City General Hospital. 100 specimens, which were used on the immunohistochemical staining of OR7C1, were obtained from surgical resection tissues at Department of Gastroenterological Surgery I, Hokkaido University Graduate School of Medicine. To obtain CTL clones, we used blood from three healthy volunteer donors and three colon cancer patients at Higashi Sapporo Hospital. We obtained informed consent from all patients and volunteer donors according to the guidelines of the Declaration of Helsinki.

**Side Population (SP) analysis and Flow cytometry analysis of OR7C1**

Trypsinized cultured cells were washed with PBS, and resuspended at 37°C in DMEM supplemented with 5% FBS. After 10 min preincubation, the cells were labeled with Hoechst 33342 (Lonza, Walkersville, MD) dye for 90 min at concentrations of 10 µg/ml for HCT15, 7.5µg/ml for HT29 and 5 µg/ml for SW480 with or without Verapamil (Sigma), which is an inhibitor of ABC transporters, at concentrations of 100 µM for HT29 and 50 µM for SW480 and HCT15. Cells were counterstained with 1 µg/ml propidium iodide (PI) (Sigma) to label dead cells. Then, 1 x 106 viable cells were sorted using a BD FACS Aria II Cell-Sorting System (BD, Franklin Lakes, NJ). Flow cytometry data was analyzed by BD FACSDiva software ver.6.1 (BD). The Hoechst dye was excited at 355 nm, and its fluorescence was measured at two wavelengths using a 405DF20 (405/20 nm band-pass filter [Hoechst Blue]) and a 635LP (635 nm long-pass edge filter [Hoechst Red]) optical filter. PI labeling was measured through the 630/BP30 filter for the discrimination of dead cells.

OR7C1 were detected using anti-OR7C1 polyclonalantibody (Sigma) as the primary antibody at 100 times dilution and using anti- rabitt Ig- FITC as the secondary antibody at 200 times dilution. Cells were stained with these antibodies and analyzed using a FACS Aria II.

**RT-PCR analysis and Quantitative RT-PCR analysis**

Total RNAs (tRNA) were isolated from the SP, MP and unsorted cells using an RNeasy Mini Kit (Qiagen, Valencia, CA) according to the manufacturer’s protocol. Complementary DNA (cDNA) was synthesized from 2 µg of total RNA by reverse transcription using Superscript III reverse transferase (Invitrogen). A cDNA panel for a set of normal human adult tissues and fetal tissues was purchased (Clontech).

On RT-PCR, PCR amplification was performed in 20 µl of PCR mixture containing 1 µl of cDNA mixture, 0.5 µl of Taq DNA polymerase (QIAGEN) and 4 pmol of primers. The PCR mixture was initially incubated at 94°C for 2 min, followed by 35 cycles of denaturation at 94°C for 15 sec, annealing at 58°C for 30 sec, and extension at 72°C for 30 sec. Primer pairs used for RT-PCR analysis were 5’-CATGATGGAGACGGAGCTGA-3’ and 5’-ACCCCGCTCGCCATGCTATT-3’ for *SOX2* with an expected PCR product size of 410 base pairs (bps), 5’- AGCTCTGTGGACTGCTGGTT-3’ and 5’- GGACGCCAGTTGCAAAGTAT-3’ for *OR7C1* with an expected PCR product size of 201 bps, 5’-TGGAGAAGGAGAAGCTGGAGCAAAA-3’ and 5’-GGCAGATGGTCGTTTGGCTGAATA-3’ for *POU5F1* with an expected PCR product size of 163 bps, 5’-CCAGCAACCAAGAAGAGGAG-3’ and 5’-GCAAGGAACTGGAAGCTTTG-3’ for *MAGEA3* with an expected PCR product size of 196 bps, 5’-TCCTTGTTCCGAGAAGCACT-3’ and 5’-GCCCAGGACGATTATCAGAA-3’ for *MAGEA4* with an expected PCR product size of 295 bps, 5’-TGAGTTTGCCATCACAGAGC-3′ and 5′-TTGCTTGCTGGTGCATTAAC-3′ for CEP55 with an expected PCR product size of 521 bp, 5’-TCAAGGACCACCGCATCTCTAC-3’ and 5’-GCACTTTCTTCGCAGTTTCCTC-3’ for *BIRC5* with an expected PCR product size of 355 bps, 5’-GCAGATTTTGGGTGGTCAGT-3’ and 5’-AGGGAGGTTAAGGCACACCT-3’ for *AURKA* with an expected PCR product size of 551 bps, 5’-CATCCCTGTCTTGTGTGTGG-3’ and 5’-CCAACAGCCCTGGATTAAGA-3’ for *EGLN3* with an expected PCR product size of 420 bps, 5’-CTCTTCCTCAAACCGTCTGC-3’ and 5’-GATCGGAGGCTAAGCAACTG-3’ for *LGR5* with an expected PCR product size of 181 bps and 5’-ACCACAGTCCATGCCATCAC-3’ and 5’-TCCACCACCCTGTTGCTGTA-3’ for *glyceraldehyde-3-phosphate dehydrogenase (GAPDH)* with an expected product size of 452 bps. *GAPDH* was used as an internal control.

Quantitative real-time PCR was performed using an ABI PRISM 7000 sequence detection system (Life Technologies) according to the manufacturer's protocol. Primers and probes were designed by the manufacturer (TaqMan gene expression assays; Life Technologies). Thermal cycling was performed using 40 cycles of denaturation at 95°C for 15 s followed by annealing at 60°C for 1 min. Each experiment was performed triplicate, with normalization to the GAPDH gene as an internal control.

**Peptide Binding Assay**

Peptide binding affinity to HLA-A24 was assessed by HLA-A24 stabilization assay as described previously (Nakao et al, 2000), based on the findings that MHC class I molecules could be stabilized on the cell surface in the presence of binding peptides. After incubation of T2-A24 TAP-deficient cells in culture medium at 26 °C for 18 hours, cells (2 × 106) were washed with ice cold PBS and suspended with 1 ml of Opti-MEM (Life Technologies, Inc.) with or without 100 μg of peptide, followed by incubation at 26°C for 3 hours and then at 37°C for 3 hours. After washing with ice cold PBS, the cells were incubated with anti-HLA-A24 mAb (c7709A2.6, kindly provided by Dr. P. G. Coulie, Ludwig Institute for Cancer Research, Brussels Branch) at 4°C for 30 min, followed by incubation with FITC-conjugated rabbit antimouse IgG +IgM (KPL, Gaithersburg, MD) at 4°C for 30 minutes. The cells were then suspended with 1 ml of PBS containing 1% formaldehyde and analyzed by FACS calibur (BD). Binding affinity was evaluated by comparing mean fluorescence intensity of HLA-A24 expression in the presence of peptide pulsation to mean fluorescence intensity in the absence of the peptide. Survivin-2B_80(9) peptide was used as positive control and SL8C peptide was negative control.

**Preparation of APCs and CD8-positive T Cells from PBMCs**

PBMCs were isolated from three healthy volunteers and three colon cancer patients by standard density gradient centrifugation on Lymphoprep (Nycomed, Oslo, Norway). PBMCs were incubated in AIM-V medium (Life Technologies, Inc.) supplemented with 2-mercaptoethanol (50 μm) and HEPES (10 mm) for 2 hours at 37°C in a culture flask to separate adherent cells and nonadherent cells. CD8-positive T lymphocytes were isolated from nonadherent cells by the MACS separation system (Miltenyi Boitech, Bergish Blabach, Germany) using anti-CD8 mAb coupled with magnetic microbeads according to the manufacturer’s instruction. To obtain PHA-stimulated blasts, CD8-negative nonadherent PBMCs were cultured in AIM-V medium containing 1 μg/ml of PHA (WAKO Chemicals, Osaka, Japan) and 100 units/ml of IL-2 for 3 days, followed by washing and cultivation in the presence of IL-2 (100 units/ml) for 4 days. Human recombinant IL-2 was kind gifts from Takeda Pharmaceutical (Osaka, Japan).

**CTL Induction and Establishment of CTL Clone**

CTL induction was performed as described previously [1, 2]. Briefly, autologous PHA-blasts were incubated at room temperature for 2 hours in AIM-V with peptide (50 μg/ml). PHA-blasts were then irradiated (100 Gy) and washed with AIM-V medium. On day 1, 5 × 105 CD8+ T cells were stimulated with 1 × 105 peptide-pulsed PHA-blasts in 2 ml of AIM-V supplemented with recombinant IL-7 (10 ng/ml: Life Technologies, Inc.). On day 7, 1 × 105 PHA-blasts were pulsed with 50 μg/ml of peptides, irradiated (100 Gy), washed once, and then added to each well. On day 8, IL-2 was added to each well at a concentration of 50 units/ml. The peptide stimulation using PHA-blasts was repeated every 7 days. During CTL induction, cells were fed with fresh AIM-V medium supplemented with IL-2 (80 units/ml) every 5 days. On day 21, CD8+ T cell reactivity was assessed by interferon (IFN)- enzyme-linked immunospot (ELISpot) assay. On day28, the cytotoxic activity of T cells was assessed by conventional 6-hour 51Cr release assay. To obtain CTL clones, standard limiting dilution was performed as described previously [4].

**Immunohistochemical staining of tissue sections.**

Immunohistochememical staining was done with formalin-fixed, paraffin-embedded sections of 100 surgical resection tissues at Department of Gastroenterological Surgery I, Hokkaido University Graduate School of Medicine and normal tissues from pathological dissection at Department of Pathology, Sapporo Medical University School of Medicine. Sections (4-5 µm thick) were deparaffinized in xylene and rehydrated in graded alcohols. Antigen retrieval was done by boiling sections for 20 min in a microwave oven in preheated 0.01 mol/L sodium citrate (pH 6.0). Endogenous peroxidase activity was blocked by 3%hydrogen peroxide in ethanol for 10 min. After blocking with 1%nonfat dry milk in PBS (pH 7.4), the sections were reacted with anti-OR7C1 polyclonal antibody (Sigma) for 1 hour followed by incubation with biotinylated anti-rabbit IgG (Nichirei, Tokyo, Japan) for 30 min. Subsequently, the sections were stained with streptavidin-biotin complex (Nichirei), followed by incubation with 3,3’-diaminobenzidine used as the chromogen and counterstaining with hematoxylin. Cytosolic staining and cell membrene were considered positive. Testis tissue was used as positive control.

**Western blot assay of OR7C1**

Cell lysate with SDS sample buffer was separated by denaturing SDS-PAGE. Separated proteins were transferred onto nitrocellulose membranes and probed with anti-OR7C1 antibody(Sigma). β-Actin was used as a loading control and was detected with the rabitt Ig antibody-HRP (Sigma). Anti-DNAJB8 antibody was used at 500 times dilution. Anti–β-actin antibodies was used at 2,000 times dilution.

**Supplemental Figure legends**

**Figure S1. Isolation of colon CICs as SP cells and the expression of OR7C1**

**(A) Isolation of SP cells from colon cancer cell lines.** SW480 cells, HT29 cells and HCT15 cells were stained using Hoechst 33342 dye and analyzed by flow cytometry. SP: side population, MP: main population. **(B) Expression of stem cell markers in SP cells.** SP cells and MP cells were isolated from SW480 cells, HT29 cells and HCT15 cells, and then the expression of stem cell markers (SOX2, POU5F1 and LGR5) was analyzed by RT-PCR. **(C) Tumor growth of** **SW480 SP cells and MP cells in NOD/SCID mice.** 101,102,103 or 104 SW480 SP cells and MP cells were injected subcutaneously into the backs of NOD/SCID mice, and tumor growth was measured weekly. Data are shown as means ± SD. Engraftment rates are summarized in Table 1. Differences between SW480 *OR7C1*-knockdown cells and control cells were examined for statistical significance by Student's t-test. Right panel: a representative picture of NOD/SCID mice injected with SP cells and MP cells. **(D) Sphere formation assay.** Data are shown as means ± SD. **(E) Western blot of OR7C1.** OR7C1 transfected 293T cells were analyzed using anti-OR7C1 antibody. Beta-actin was used as a positive control.  **(F) Scatterplot of OR7C1 intensity (IS) and positivity (PS). (G) Kaplan-Meier curves for overall survival depending on OR7C1 positivity. (H) Scatterplot of OR7C1 positivity (PS) and ALDH1 positivity (PS).**

**Figure S2. *OR7C1* gene overexpression experiments**

**(A) Quantitive RT-PCR of *OR7C1* and CICs markers.** Total RNAs were isolated from negative control or *OR7C1*-overexpressed HCT15 cells. The expression of *OR7C1*, *SOX2*, *LGR5* and *POU5F1* mRNAs was examined by quantitative RT-PCR (qRT-PCR). Data are shown as means ± SD. **(B) SP ratios of HCT15 cells in which OR7C1 mRNA was overexpressed.** **(C)** **Sphere formation assay.** Data are shown as means ± SD. **(D) Tumor growth of** **HCT15 *OR7C1*-overexpression cells and control cells.** 101,102 or103 or 104 HCT15 *OR7C1*-overexpression cells and control cells were inoculated subcutaneously into the backs of NOD/SCID mice, and tumor growth was measured weekly. Engraftment rate was showed in Table 1. Data represent means ± SD. **(E)** **Quantitive RT-PCR of OR7C1 and CICs markers.** **(F) Isolation of SP cells from colon cancer cell lines.** **(G) Sphere formation assay.** Data represent means ± SD. **(H) Tumor growth of HT29 OR7C1-overexpression cells and control cells.** 101, 102, 103 or 104 HT29 OR7C1-overexpression cells and control cells were inoculated subcutaneously into the backs of NOD/SCID mice, and tumor growth was measured weekly. Data represent means ± SD. Engraftment rate was showed in Table 1. Difference between HT29 OR7C1-overexpression cells and control cells were examined for statistical significance using Student's t-test.

**Figure S3. *OR7C1* gene knockdown experiments**

**(A) Quantitive RT-PCR of OR7C1 and CICs markers. T**otal RNAs were isolated 48 hours after transfection of a negative control or OR7C1-specific siRNA 1, 2 and 3. **(B) Isolation of SP cells from colon cancer cell lines. (C) Tumor growth of HCT15 OR7C1-knockdown cells and control cells.** 103 HCT15 OR7C1-knockdown cells and control cells were inoculated subcutaneously into the backs of NOD/SCID mice, and tumor growth was measured weekly. Data represent means ± SD. Engraftment rate was showed in Table 1. Difference between HCT15 OR7C1-knockdown cells and control cells was examined for statistical significance using Student's t-test. **(D) Sphere formation assay.** Data represent means ± SD. **(E) Quantitive RT-PCR of OR7C1 and CICs markers.** Total RNAs were isolated 48 hours after transfection of a negative control or OR7C1-specific siRNA 1, 2 and 3. **(F) Isolation of SP cells from colon cancer cell lines.** **(G) Tumour growth of HT29 OR7C1-knockdown cells and control cells.** 103 HT29 OR7C1-knockdown cells and control cells were inoculated subcutaneously into the backs of NOD/SCID mice, and tumor growth was measured weekly. Data represent means ± SD. Engraftment rate was showed in Table 1. Difference between HT29 OR7C1-knockdown cells and control cells was examined for statistical significance using Student's t-test. **(H)** **Sphere formation assay.** Data represent means ± SD.

**Figure S4. Establishment of CIC-targeting immunotherapy using antigenic peptide derived from OR7C1.**

**(A) IFN-γ** **ELISpot assay.** Peripheral blood mononuclear cells (PBMCs) were isolated from 5 CRC patients (A, B, C, D, E) and 3 healthy volunteers (F, G, H). PBMCs were stimulated by an OR7C1-derived antigenic peptide mixture (277(9), 34(10), 251(10), 131(10) and 93(10)) using autologous PHA blast as antigen-presenting cells. Relativities for OR7C1 peptides were examined by an IFN-γ ELISpot assay using OR7C1 peptide-pulsed T2-A24 cells as targets. K562 cells were used as a negative control. **(B) 51Cr release assay.** The cytotoxic activities against peptide-pulsed T2-A24 cells in colon cancer patients and healthy donors were examined by a 51Cr release assay using OR7C1 peptide-pulsed T2-A24 cells as targets. Data are shown as means ± SD. **(C) Cytotoxicity against OR7C1+ cells by CTL clone #23.** Cytotoxic activities against OR7C1+ cells and OR7C1- cells derived from SW480, HCT15-B2M and HT29 cells were examined by a 51Cr release assay using CTL clone #23. Data are shown as means ± SD. **(D) Inhibition of cytotoxicity by anti-HLA class I antibody.** The cytotoxicities of CTL clone #23 for OR7C1+ cells were examined by a 51Cr release assay using anti-HLA class I antibody (W6/32). OR7C1+ cells and OR7C1- cells were isolated from HCT15-B2M cells. K562 cells were used as a negative control. The effector/target ratio (E/T) was 6. Data are shown as means ± SD.
